# Supplementary material for: A mass spectrometrical surface chemistry study of aluminum nitride ALD from tris-dimethylamido aluminum and ammonia
Source: Royal Society of Chemistry journal article supplement (doi:10.1039/d4ma00922c), 2024-01-01
Supplement: d4ma00922c1.pdf [file d4ma00922c1.pdf]

Supporting information for:

## A Mass Spectrometrical Surface Chemistry Study of AlN ALD from TDMAA and NH<sub>3</sub>.

Pamburayi Mpofu<sup>1</sup>, Houyem Hafdi<sup>1</sup>, Jonas Lauridsen<sup>2</sup>, Oscar Alm<sup>2</sup>, Tommy Larsson<sup>2</sup>, Henrik Pedersen<sup>1\*</sup>

<sup>1</sup> Department of Physics, Chemistry and Biology, Linköping University, SE-581 83, Linköping, Sweden

<sup>2</sup> Seco Tools AB, SE-737 82, Fagersta, Sweden

\*Corresponding author: [henrik.pedersen@liu.se](mailto:henrik.pedersen@liu.se)

### Film growth

Table S1: raw data for Fig. 1a) b) and c) for saturation curves, temperature window and linear growth for the plasma process

| <b>TDMAA pulse</b>          | <b>GPC</b>         | <b>Error bar</b>       | <b>NH3 pulse</b> | <b>GPC</b>       | <b>Error bar</b> |
|-----------------------------|--------------------|------------------------|------------------|------------------|------------------|
| <b>s</b>                    | <b>Å/cycle</b>     |                        | <b>s</b>         | <b>Å/cycle</b>   |                  |
|                             | <b>TDMAA pulse</b> | <b>5% of GPC</b>       |                  | <b>NH3 pulse</b> | <b>5% of GPC</b> |
| 4                           | 1.04               | 0.052                  | 12               | 1.04             | 0.052            |
| 6                           | 1.06               | 0.053                  | 15               | 1.09             | 0.0545           |
| 8                           | 1.08               | 0.054                  | 18               | 1.01             | 0.0505           |
|                             |                    |                        |                  |                  |                  |
| <b>Temperature</b>          | <b>GPC</b>         | <b>Error bar</b>       |                  |                  |                  |
| <b>° C</b>                  | <b>Å/cycle</b>     | <b>5% of GPC</b>       |                  |                  |                  |
| 125                         | 0.98               | 0.049                  |                  |                  |                  |
| 150                         | 1.02               | 0.051                  |                  |                  |                  |
| 200                         | 1.04               | 0.052                  |                  |                  |                  |
| 250                         | 1.08               | 0.054                  |                  |                  |                  |
| 275                         | 1.38               | 0.069                  |                  |                  |                  |
| 300                         | 1.8                | 0.09                   |                  |                  |                  |
| 350                         | 2.04               | 0.102                  |                  |                  |                  |
| 400                         | 2.3                | 0.115                  |                  |                  |                  |
|                             |                    |                        |                  |                  |                  |
|                             |                    |                        |                  |                  |                  |
| <b>Number of ALD cycles</b> | <b>Thickness</b>   | <b>Error bar</b>       |                  |                  |                  |
|                             | <b>Å</b>           | <b>5% of Thickness</b> |                  |                  |                  |
| 300                         | 360                | 18                     |                  |                  |                  |
| 400                         | 450                | 22.5                   |                  |                  |                  |
| 500                         | 540                | 27                     |                  |                  |                  |
| 1000                        | 990                | 49.5                   |                  |                  |                  |

Table S2: raw data for Fig. 2a) b) and c) for saturation curves, temperature window and linear growth for the thermal process

| <b>TDMAA pulse</b>          | <b>GPC</b>         | <b>Error bar</b>       | <b>NH3 pulse</b> | <b>GPC</b>       | <b>Error bar</b> |
|-----------------------------|--------------------|------------------------|------------------|------------------|------------------|
| <b>s</b>                    | <b>Å/cycle</b>     | <b>5% of GPC</b>       | <b>s</b>         | <b>Å/cycle</b>   | <b>5% of GPC</b> |
|                             | <b>TDMAA pulse</b> |                        |                  | <b>NH3 pulse</b> |                  |
| 0                           | 0                  | 0                      | 0                | 0                | 0                |
| 2                           | 0.72               | 0.036                  | 6                | 0.75             | 0.0375           |
| 4                           | 0.79               | 0.0395                 | 12               | 0.82             | 0.041            |
| 6                           | 0.78               | 0.039                  | 15               | 0.84             | 0.042            |
|                             |                    |                        | 18               | 0.84             | 0.042            |
|                             |                    |                        |                  |                  |                  |
|                             |                    |                        |                  |                  |                  |
| <b>Temperature</b>          | <b>GPC</b>         | <b>Error bar</b>       |                  |                  |                  |
| <b>° C</b>                  | <b>Å/cycle</b>     | <b>5% of GPC</b>       |                  |                  |                  |
| 125                         | 0.58               | 0.029                  |                  |                  |                  |
| 150                         | 0.78               | 0.039                  |                  |                  |                  |
| 200                         | 0.82               | 0.041                  |                  |                  |                  |
| 225                         | 0.8                | 0.04                   |                  |                  |                  |
| 250                         | 0.84               | 0.042                  |                  |                  |                  |
| 300                         | 1.32               | 0.066                  |                  |                  |                  |
| 350                         | 1.52               | 0.076                  |                  |                  |                  |
| 375                         | 1.36               | 0.068                  |                  |                  |                  |
| 400                         | 1.26               | 0.063                  |                  |                  |                  |
|                             |                    |                        |                  |                  |                  |
|                             |                    |                        |                  |                  |                  |
| <b>Number of ALD cycles</b> | <b>Thickness</b>   | <b>Error bar</b>       |                  |                  |                  |
|                             | <b>Å</b>           | <b>5% of Thickness</b> |                  |                  |                  |
| 300                         | 270                | 13.5                   |                  |                  |                  |
| 400                         | 335                | 16.75                  |                  |                  |                  |
| 500                         | 420                | 21                     |                  |                  |                  |
| 1000                        | 800                | 40                     |                  |                  |                  |

## TDMAA-NH<sub>3</sub> residual gas analysis: mass spectrometry

*Table S3: raw data for Fig. 3 for the survey scan combining the background where no precursor is pulse together with the plasma and the thermal process. An offset of 0.1 was used between each process for visual clarity when making graphical plots. This helps to explain why we chose specific m/z values for monitoring with time.*

| m/z      | Partial pressure | m/z | m/z        | Plasma       | m/z | m/z        | Thermal      |
|----------|------------------|-----|------------|--------------|-----|------------|--------------|
| 0 offset | mbar             |     | 0.1 offset | mbar         |     | 0.2 offset | mbar         |
|          | Background       |     |            | Plasma       |     |            | Thermal      |
| 1        | 1.2151E-10       | 1   | 1.1        | 6.6566E-11   | 1   | 1.2        | 2.4958E-10   |
| 2        | 1.7766E-8        | 2   | 2.1        | 1.34568E-8   | 2   | 2.2        | 1.6503E-8    |
| 3        | 1.5323E-11       | 3   | 3.1        | 6.90632E-11  | 3   | 3.2        | -1.91136E-11 |
| 4        | 1.2622E-10       | 4   | 4.1        | 1.2116E-9    | 4   | 4.2        | 8.6752E-10   |
| 5        | 2.9437E-11       | 5   | 5.1        | 9.4464E-11   | 5   | 5.2        | -1.42912E-10 |
| 6        | -4.382E-11       | 6   | 6.1        | 2.25928E-10  | 6   | 6.2        | 1.52E-10     |
| 7        | 2.9437E-11       | 7   | 7.1        | 1.39632E-10  | 7   | 7.2        | 1.82648E-10  |
| 8        | 7.2585E-12       | 8   | 8.1        | 1.57104E-10  | 8   | 8.2        | -2.1684E-10  |
| 9        | -1.4786E-12      | 9   | 9.1        | 1.8388E-11   | 9   | 9.2        | -4.96264E-11 |
| 10       | -1.6264E-11      | 10  | 10.1       | 9.568E-11    | 10  | 10.2       | 3.98944E-11  |
| 11       | 1.1963E-11       | 11  | 11.1       | 3.7072E-11   | 11  | 11.2       | 1.36944E-10  |
| 12       | 8.0515E-11       | 12  | 12.1       | 4.51744E-10  | 12  | 12.2       | 3.65584E-10  |
| 13       | 5.4976E-11       | 13  | 13.1       | 7.09824E-10  | 13  | 13.2       | 4.0268E-10   |
| 14       | 1.0749E-7        | 14  | 14.1       | 8.6144E-8    | 14  | 14.2       | 8.6048E-8    |
| 15       | 1.1041E-9        | 15  | 15.1       | 1.18376E-8   | 15  | 15.2       | 4.94768E-8   |
| 16       | 8.843E-10        | 16  | 16.1       | 8.6144E-8    | 16  | 16.2       | 8.6048E-8    |
| 17       | 1.6464E-8        | 17  | 17.1       | 8.6144E-8    | 17  | 17.2       | 8.6048E-8    |
| 18       | 3.3949E-8        | 18  | 18.1       | 8.6144E-8    | 18  | 18.2       | 8.6048E-8    |
| 19       | 1.1748E-10       | 19  | 19.1       | 7.894E-10    | 19  | 19.2       | 5.2164E-10   |
| 20       | 5.7354E-8        | 20  | 20.1       | 8.6144E-8    | 20  | 20.2       | 8.6048E-8    |
| 21       | 8.6026E-12       | 21  | 21.1       | 1.46752E-10  | 21  | 21.2       | 1.11672E-10  |
| 22       | 2.1372E-11       | 22  | 22.1       | -5.37936E-11 | 22  | 22.2       | 2.13288E-10  |
| 23       | -5.5111E-12      | 23  | 23.1       | 1.1936E-11   | 23  | 23.2       | 6.51648E-11  |
| 24       | 3.4814E-11       | 24  | 24.1       | 1.07536E-13  | 24  | 24.2       | -1.2248E-10  |
| 25       | 6.5057E-11       | 25  | 25.1       | 3.15651E-10  | 25  | 25.2       | 1.84928E-10  |
| 26       | 3.0163E-10       | 26  | 26.1       | 1.74398E-9   | 26  | 26.2       | 1.24047E-9   |
| 27       | 1.4811E-9        | 27  | 27.1       | 1.10496E-8   | 27  | 27.2       | 1.03024E-8   |
| 28       | 1.0749E-7        | 28  | 28.1       | 8.6144E-8    | 28  | 28.2       | 8.6048E-8    |
| 29       | 3.7486E-8        | 29  | 29.1       | 8.6144E-8    | 29  | 29.2       | 8.6048E-8    |
| 30       | 1.0564E-9        | 30  | 30.1       | 9.2392E-9    | 30  | 30.2       | 9.3488E-9    |
| 31       | 3.0096E-10       | 31  | 31.1       | 1.16872E-9   | 31  | 31.2       | 8.2648E-10   |
| 32       | 1.1666E-9        | 32  | 32.1       | 4.64152E-9   | 32  | 32.2       | 4.31232E-9   |
| 33       | 4.4895E-11       | 33  | 33.1       | 2.94744E-10  | 33  | 33.2       | 2.8588E-10   |
| 34       | 9.1941E-11       | 34  | 34.1       | 3.18E-10     | 34  | 34.2       | 2.2216E-10   |
| 35       | 2.1372E-11       | 35  | 35.1       | 2.06168E-10  | 35  | 35.2       | 1.95976E-11  |
| 36       | 1.6041E-9        | 36  | 36.1       | 2.55984E-10  | 36  | 36.2       | 2.55984E-10  |
| 37       | 6.3041E-11       | 37  | 37.1       | 3.20288E-10  | 37  | 37.2       | 1.1288E-10   |
| 38       | 3.937E-10        | 38  | 38.1       | 2.64056E-9   | 38  | 38.2       | 2.82984E-9   |
| 39       | 6.1482E-10       | 39  | 39.1       | 3.71136E-9   | 39  | 39.2       | 3.0132E-9    |
| 40       | 1.0749E-7        | 40  | 40.1       | 8.6144E-8    | 40  | 40.2       | 8.6048E-8    |
| 41       | 1.258E-9         | 41  | 41.1       | 7.06176E-9   | 41  | 41.2       | 4.916E-9     |
| 42       | 5.2745E-10       | 42  | 42.1       | 3.44072E-9   | 42  | 42.2       | 2.79408E-9   |
| 43       | 1.2708E-9        | 43  | 43.1       | 7.31016E-9   | 43  | 43.2       | 5.07784E-9   |
| 44       | 2.3837E-9        | 44  | 44.1       | 1.42248E-8   | 44  | 44.2       | 1.29184E-8   |
| 45       | 1.9141E-10       | 45  | 45.1       | 2.3633E-9    | 45  | 45.2       | 2.2135E-9    |
| 46       | 1.1143E-10       | 46  | 46.1       | 3.9932E-10   | 46  | 46.2       | 1.4192E-10   |
| 47       | 7.5139E-11       | 47  | 47.1       | 1.10192E-10  | 47  | 47.2       | -6.71008E-11 |
| 48       | 2.406E-11        | 48  | 48.1       | 2.74856E-10  | 48  | 48.2       | -5.19112E-11 |
| 49       | 6.0353E-11       | 49  | 49.1       | 1.92056E-10  | 49  | 49.2       | 1.56032E-10  |
| 50       | 9.1941E-11       | 50  | 50.1       | 3.5376E-10   | 50  | 50.2       | 2.30096E-10  |

Table S4: raw data for Fig. 4 for the  $m/z = 44$  and  $m/z = 45$  created during the plasma and thermal processes

| PLASMA    |                               |                               | THERMAL   |                               |                               |
|-----------|-------------------------------|-------------------------------|-----------|-------------------------------|-------------------------------|
| Time (ms) | $m/z = 44$<br>pressure (mbar) | $m/z = 45$<br>pressure (mbar) | Time (ms) | $m/z = 44$<br>pressure (mbar) | $m/z = 45$<br>pressure (mbar) |
| 7664      | 7.333E-10                     | 1.211E-10                     | 7664      | 7.0048E-10                    | 8.0073E-11                    |
| 27168     | 6.1914E-10                    | 8.6956E-11                    | 27168     | 6.4192E-10                    | 8.6612E-11                    |
| 46673     | 6.1582E-10                    | 7.3325E-11                    | 46673     | 6.4252E-10                    | 7.0628E-11                    |
| 66178     | 5.7001E-10                    | 8.5064E-11                    | 66178     | 6.3494E-10                    | 6.2327E-11                    |
| 85682     | 5.6816E-10                    | 5.9532E-11                    | 85682     | 6.1341E-10                    | 6.0874E-11                    |
| 105187    | 1.3082E-9                     | 3.2822E-10                    | 105187    | 7.1647E-10                    | 2.4137E-10                    |
| 126773    | 7.4655E-10                    | 1.5443E-10                    | 124692    | 7.2701E-10                    | 1.154E-10                     |
| 148359    | 6.2555E-10                    | 9.8007E-11                    | 144196    | 6.3533E-10                    | 7.365E-11                     |
| 167863    | 6.0538E-10                    | 7.7322E-11                    | 163701    | 6.239E-10                     | 7.5423E-11                    |
| 187368    | 5.9382E-10                    | 6.3818E-11                    | 183206    | 6.0832E-10                    | 4.9437E-11                    |
| 206873    | 5.9575E-10                    | 9.6459E-11                    | 202710    | 6.1694E-10                    | 5.4193E-11                    |
| 226378    | 6.0515E-10                    | 8.3495E-11                    | 222215    | 6.4535E-10                    | 7.0585E-11                    |
| 245882    | 5.8261E-10                    | 6.2388E-11                    | 241720    | 6.4617E-10                    | 7.2041E-11                    |
| 265387    | 5.8583E-10                    | 5.4677E-11                    | 261224    | 6.3067E-10                    | 7.2847E-11                    |
| 284892    | 5.7864E-10                    | 6.0427E-11                    | 280729    | 6.0955E-10                    | 4.2903E-11                    |
| 304396    | 9.5328E-10                    | 1.9873E-10                    | 300234    | 6.2117E-10                    | 2.1353E-10                    |
| 323901    | 6.6707E-10                    | 1.1011E-10                    | 319738    | 7.2454E-10                    | 1.0871E-10                    |
| 343406    | 6.0115E-10                    | 6.6237E-11                    | 339243    | 6.2459E-10                    | 6.9234E-11                    |
| 362910    | 5.6163E-10                    | 6.093E-11                     | 358748    | 6.2626E-10                    | 5.884E-11                     |
| 382415    | 5.6097E-10                    | 4.0797E-11                    | 378253    | 6.321E-10                     | 5.2661E-11                    |
| 401920    | 5.4774E-10                    | 7.1652E-11                    | 397757    | 6.2882E-10                    | 5.2383E-11                    |
| 421424    | 5.8908E-10                    | 7.4887E-11                    | 417262    | 6.4554E-10                    | 6.4522E-11                    |
| 440929    | 5.9719E-10                    | 6.6765E-11                    | 436767    | 6.4737E-10                    | 6.9923E-11                    |
| 460434    | 5.6198E-10                    | 4.4756E-11                    | 456272    | 6.4646E-10                    | 6.7093E-11                    |
| 479938    | 5.8139E-10                    | 5.1125E-11                    | 475776    | 6.3652E-10                    | 5.2495E-11                    |
| 499443    | 9.3248E-10                    | 1.4988E-10                    | 495281    | 6.3353E-10                    | 2.3347E-10                    |
| 518948    | 6.4198E-10                    | 9.9398E-11                    | 514786    | 7.6645E-10                    | 1.1026E-10                    |
| 538452    | 5.7376E-10                    | 6.1385E-11                    | 534290    | 6.4161E-10                    | 7.1664E-11                    |
| 557957    | 5.7344E-10                    | 5.9337E-11                    | 553795    | 6.4817E-10                    | 7.7169E-11                    |
| 577462    | 5.812E-10                     | 5.8439E-11                    | 573300    | 6.1892E-10                    | 5.7659E-11                    |
| 596966    | 5.6898E-10                    | 6.4176E-11                    | 592804    | 6.4334E-10                    | 5.8956E-11                    |
| 616471    | 6.0836E-10                    | 7.0843E-11                    | 612309    | 6.8603E-10                    | 8.1939E-11                    |
| 635976    | 5.8613E-10                    | 6.6991E-11                    | 631814    | 6.6653E-10                    | 7.1975E-11                    |
| 655480    | 5.8269E-10                    | 6.1004E-11                    | 651319    | 6.5948E-10                    | 6.5833E-11                    |
| 674985    | 5.8365E-10                    | 7.6539E-11                    | 670823    | 6.3661E-10                    | 6.2969E-11                    |
| 694490    | 9.4692E-10                    | 1.6288E-10                    | 690328    | 6.3149E-10                    | 2.5891E-10                    |
| 713995    | 6.4922E-10                    | 7.9135E-11                    | 709833    | 8.0426E-10                    | 1.0879E-10                    |
| 733499    | 5.8544E-10                    | 7.2022E-11                    | 729337    | 6.5618E-10                    | 7.7236E-11                    |
| 753004    | 5.6797E-10                    | 6.5716E-11                    | 748842    | 6.4565E-10                    | 8.116E-11                     |
| 772509    | 5.9209E-10                    | 5.5394E-11                    | 768347    | 6.4311E-10                    | 5.5396E-11                    |
| 792013    | 5.6847E-10                    | 7.2902E-11                    | 787851    | 6.6411E-10                    | 5.2534E-11                    |
| 811518    | 6.2144E-10                    | 5.4454E-11                    | 807356    | 6.8176E-10                    | 9.3948E-11                    |
| 831023    | 6.0776E-10                    | 6.8147E-11                    | 826861    | 6.7316E-10                    | 6.5615E-11                    |
| 850528    | 5.9114E-10                    | 5.3504E-11                    | 846366    | 6.6692E-10                    | 5.1856E-11                    |
| 870032    | 5.8911E-10                    | 6.1153E-11                    | 865870    | 6.653E-10                     | 6.0028E-11                    |
| 889537    | 9.2141E-10                    | 1.5804E-10                    | 885375    | 6.5541E-10                    | 2.748E-10                     |
| 909042    | 6.5786E-10                    | 8.8358E-11                    | 904880    | 8.2608E-10                    | 1.1869E-10                    |
| 928546    | 5.9779E-10                    | 5.7765E-11                    | 924384    | 6.9418E-10                    | 7.0074E-11                    |
| 948051    | 5.6805E-10                    | 5.156E-11                     | 943889    | 6.6267E-10                    | 6.1093E-11                    |
| 967556    | 5.7615E-10                    | 5.9548E-11                    | 963394    | 6.6124E-10                    | 5.9832E-11                    |
| 987060    | 5.8028E-10                    | 4.8675E-11                    | 982899    | 6.5189E-10                    | 4.8392E-11                    |

Table S5: raw data for Fig. 5 for the  $m/z = 29$  and  $m/z = 16$  created during both the plasma and thermal processes

| PLASMA    |                 | THERMAL   |                 | PLASMA    |                 | THERMAL   |                 |
|-----------|-----------------|-----------|-----------------|-----------|-----------------|-----------|-----------------|
| Time (ms) | $m/z = 29$      | Time (ms) | $m/z = 29$      | Time (ms) | $m/z = 16$      | Time (ms) | $m/z = 16$      |
|           | pressure (mbar) |           | pressure (mbar) |           | pressure (mbar) |           | pressure (mbar) |
| 10766     | 2.6578E-8       | 10766     | 4.2166E-8       | 7664      | 9.0869E-10      | 7664      | 7.9846E-10      |
| 11788     | 2.6236E-8       | 11788     | 3.8775E-8       | 20667     | 9.3655E-10      | 20667     | 6.6559E-10      |
| 12809     | 2.5956E-8       | 12809     | 3.5963E-8       | 33670     | 7.5978E-10      | 33670     | 6.4118E-10      |
| 13831     | 2.5804E-8       | 13831     | 3.3526E-8       | 46673     | 7.5444E-10      | 46673     | 6.0975E-10      |
| 14852     | 2.5822E-8       | 14852     | 3.1713E-8       | 59676     | 7.1147E-10      | 59676     | 6.0572E-10      |
| 15874     | 2.679E-8        | 15874     | 3.0138E-8       | 72679     | 7.091E-10       | 72679     | 5.8691E-10      |
| 16895     | 2.7907E-8       | 16895     | 2.8902E-8       | 85682     | 6.7684E-10      | 85682     | 5.6426E-10      |
| 17917     | 2.8922E-8       | 17917     | 2.7955E-8       | 98685     | 6.5844E-10      | 98686     | 5.516E-10       |
| 18938     | 2.9863E-8       | 18938     | 2.7151E-8       | 111689    | 1.5463E-7       | 113770    | 2.685E-8        |
| 19960     | 3.0805E-8       | 19960     | 2.6497E-8       | 130397    | 1.0119E-7       | 125456    | 2.5428E-8       |
| 20981     | 3.1453E-8       | 20981     | 2.6081E-8       | 133000    | 5.5869E-8       | 128559    | 1.8477E-8       |
| 22003     | 3.2056E-8       | 22003     | 2.5655E-8       | 136624    | 3.4224E-8       | 131662    | 1.3951E-8       |
| 23024     | 3.2604E-8       | 23024     | 2.5228E-8       | 139727    | 2.368E-8        | 141266    | 6.9261E-9       |
| 24046     | 3.2929E-8       | 24046     | 2.4936E-8       | 142830    | 1.7746E-8       | 150870    | 4.9669E-9       |
| 25067     | 3.3116E-8       | 25067     | 2.486E-8        | 152435    | 9.6558E-9       | 159454    | 3.815E-9        |
| 26089     | 3.3466E-8       | 26089     | 2.4686E-8       | 159958    | 6.5597E-9       | 168037    | 3.1105E-9       |
| 27110     | 3.3725E-8       | 27110     | 2.5412E-8       | 169562    | 5.0273E-9       | 176620    | 2.6329E-9       |
| 28132     | 3.3806E-8       | 28132     | 2.6603E-8       | 178145    | 4.0623E-9       | 185203    | 2.3089E-9       |
| 29153     | 3.3905E-8       | 29153     | 2.7666E-8       | 186728    | 3.3946E-9       | 193786    | 1.9844E-9       |
| 30175     | 3.4062E-8       | 30175     | 2.8525E-8       | 195311    | 2.9409E-9       | 202369    | 1.808E-9        |
| 31196     | 3.4079E-8       | 31196     | 2.9399E-8       | 203895    | 2.6022E-9       | 210953    | 1.6103E-9       |
| 32218     | 3.4146E-8       | 32218     | 3.0218E-8       | 212478    | 2.3002E-9       | 219536    | 1.5222E-9       |
| 33239     | 3.4131E-8       | 33239     | 3.092E-8        | 221061    | 2.1219E-9       | 228119    | 1.3757E-9       |
| 34261     | 3.4175E-8       | 34261     | 3.144E-8        | 229644    | 1.9485E-9       | 236702    | 1.2932E-9       |
| 35282     | 3.419E-8        | 35282     | 3.1944E-8       | 238227    | 1.7549E-9       | 245285    | 1.1935E-9       |
| 36304     | 3.4161E-8       | 36304     | 3.233E-8        | 246810    | 1.6398E-9       | 253868    | 1.1228E-9       |
| 37325     | 3.4234E-8       | 37325     | 3.2608E-8       | 255393    | 1.5137E-9       | 262451    | 1.076E-9        |
| 38347     | 3.4282E-8       | 38347     | 3.2794E-8       | 263976    | 1.3443E-9       | 271034    | 1.0394E-9       |
| 39368     | 3.4234E-8       | 39368     | 3.2991E-8       | 272559    | 1.3711E-9       | 279618    | 9.8791E-10      |
| 40390     | 3.4243E-8       | 40390     | 3.3089E-8       | 281143    | 1.2477E-9       | 288201    | 9.3779E-10      |
| 41411     | 3.4308E-8       | 41411     | 3.3239E-8       | 289726    | 1.2135E-9       | 296784    | 8.6577E-10      |
| 42433     | 3.4247E-8       | 42433     | 3.3317E-8       | 298309    | 1.1639E-9       | 313949    | 2.2845E-8       |
| 43454     | 3.4251E-8       | 43454     | 3.3339E-8       | 306892    | 1.1224E-9       | 325635    | 1.6746E-8       |
| 44476     | 3.4224E-8       | 44476     | 3.3373E-8       | 317556    | 1.0334E-7       | 335240    | 7.759E-9        |
| 45497     | 3.4298E-8       | 45497     | 3.3383E-8       | 323262    | 1.0979E-7       | 344844    | 5.4201E-9       |
| 46519     | 3.4302E-8       | 46519     | 3.3466E-8       | 325865    | 1.0979E-7       | 353427    | 4.1419E-9       |

|       |           |       |           |        |           |        |            |
|-------|-----------|-------|-----------|--------|-----------|--------|------------|
| 47540 | 3.4202E-8 | 47541 | 3.3488E-8 | 328468 | 6.5242E-8 | 362010 | 3.323E-9   |
| 48562 | 3.4284E-8 | 48562 | 3.3419E-8 | 332092 | 3.9098E-8 | 370593 | 2.8115E-9  |
| 49583 | 3.4347E-8 | 49583 | 3.3519E-8 | 335195 | 2.6501E-8 | 379176 | 2.4084E-9  |
| 50605 | 3.4311E-8 | 50605 | 3.3533E-8 | 338298 | 1.9701E-8 | 387760 | 2.1254E-9  |
| 51626 | 3.4272E-8 | 51627 | 3.3448E-8 | 347902 | 1.0463E-8 | 396343 | 1.9294E-9  |
| 52648 | 3.4414E-8 | 52648 | 3.3413E-8 | 355425 | 7.1641E-9 | 404926 | 1.6919E-9  |
| 53669 | 3.4318E-8 | 53670 | 3.3499E-8 | 365030 | 5.4445E-9 | 413509 | 1.6006E-9  |
| 54691 | 3.428E-8  | 54691 | 3.3512E-8 | 373613 | 4.4361E-9 | 422092 | 1.4752E-9  |
| 55712 | 3.4316E-8 | 55712 | 3.3472E-8 | 382196 | 3.7189E-9 | 430675 | 1.3738E-9  |
| 56734 | 3.4308E-8 | 56734 | 3.3519E-8 | 390779 | 3.199E-9  | 439258 | 1.2478E-9  |
| 57755 | 3.4317E-8 | 57756 | 3.348E-8  | 399362 | 2.8433E-9 | 447841 | 1.2144E-9  |
| 58777 | 3.4284E-8 | 58777 | 3.3482E-8 | 407945 | 2.5626E-9 | 456424 | 1.1473E-9  |
| 59798 | 3.4382E-8 | 59798 | 3.351E-8  | 416528 | 2.3036E-9 | 465007 | 1.082E-9   |
| 60820 | 3.4359E-8 | 60820 | 3.3476E-8 | 425111 | 2.1098E-9 | 473590 | 1.0391E-9  |
| 61841 | 3.4257E-8 | 61841 | 3.3455E-8 | 433695 | 1.956E-9  | 482174 | 9.5235E-10 |
| 62863 | 3.436E-8  | 62863 | 3.3445E-8 | 442278 | 1.827E-9  | 490757 | 9.3786E-10 |
| 63884 | 3.4311E-8 | 63884 | 3.351E-8  | 450861 | 1.7041E-9 | 499340 | 4.6969E-8  |
| 64906 | 3.4348E-8 | 64906 | 3.3496E-8 | 459444 | 1.6071E-9 | 519608 | 2.0609E-8  |
| 65927 | 3.4356E-8 | 65927 | 3.3388E-8 | 468027 | 1.448E-9  | 522711 | 1.537E-8   |
| 66949 | 3.437E-8  | 66949 | 3.3438E-8 | 476610 | 1.4206E-9 | 532315 | 7.3926E-9  |
| 67970 | 3.4361E-8 | 67970 | 3.3532E-8 | 485193 | 1.3213E-9 | 541920 | 5.2248E-9  |
| 68992 | 3.4366E-8 | 68992 | 3.3421E-8 | 493776 | 1.3346E-9 | 550503 | 4.0687E-9  |
| 70013 | 3.4425E-8 | 70013 | 3.3451E-8 | 502359 | 1.2392E-9 | 559086 | 3.2723E-9  |
| 71035 | 3.4302E-8 | 71035 | 3.3437E-8 | 513024 | 1.0312E-7 | 567669 | 2.755E-9   |
| 72056 | 3.4272E-8 | 72056 | 3.3417E-8 | 518729 | 1.085E-7  | 576252 | 2.3758E-9  |
| 73078 | 3.4347E-8 | 73078 | 3.3464E-8 | 521332 | 1.128E-7  | 584835 | 2.1023E-9  |
| 74099 | 3.4331E-8 | 74099 | 3.3456E-8 | 523935 | 7.3516E-8 | 593418 | 1.9073E-9  |
| 75121 | 3.4302E-8 | 75121 | 3.3449E-8 | 527560 | 4.2984E-8 | 602002 | 1.7569E-9  |
| 76142 | 3.4375E-8 | 76142 | 3.3488E-8 | 530663 | 2.866E-8  | 610585 | 1.5887E-9  |
| 77164 | 3.435E-8  | 77164 | 3.3461E-8 | 533766 | 2.103E-8  | 619168 | 1.5032E-9  |
| 78185 | 3.4404E-8 | 78185 | 3.3556E-8 | 536869 | 1.6434E-8 | 627751 | 1.3912E-9  |
| 79207 | 3.4382E-8 | 79207 | 3.3447E-8 | 546473 | 9.5644E-9 | 636334 | 1.335E-9   |
| 80228 | 3.4342E-8 | 80228 | 3.3398E-8 | 553997 | 6.7214E-9 | 644917 | 1.2171E-9  |
| 81250 | 3.4337E-8 | 81250 | 3.355E-8  | 563601 | 5.251E-9  | 653500 | 1.161E-9   |
| 82271 | 3.4297E-8 | 82271 | 3.3402E-8 | 572184 | 4.3343E-9 | 662083 | 1.0942E-9  |
| 83293 | 3.4332E-8 | 83293 | 3.342E-8  | 580767 | 3.6757E-9 | 670666 | 1.0453E-9  |
| 84314 | 3.4294E-8 | 84314 | 3.3465E-8 | 589350 | 3.1969E-9 | 679249 | 1.0064E-9  |
| 85336 | 3.4353E-8 | 85336 | 3.3446E-8 | 597933 | 2.8475E-9 | 687832 | 9.9091E-10 |
| 86357 | 3.4337E-8 | 86357 | 3.3451E-8 | 606516 | 2.5604E-9 | 696415 | 7.0278E-9  |
| 87379 | 3.4259E-8 | 87379 | 3.3408E-8 | 615099 | 2.3515E-9 | 707080 | 2.8687E-8  |
| 88400 | 3.4288E-8 | 88400 | 3.3412E-8 | 623683 | 2.1476E-9 | 712264 | 2.8351E-8  |

|        |           |        |           |        |           |         |            |
|--------|-----------|--------|-----------|--------|-----------|---------|------------|
| 89422  | 3.4374E-8 | 89422  | 3.34E-8   | 632266 | 1.9621E-9 | 715367  | 2.1392E-8  |
| 90443  | 3.4193E-8 | 90443  | 3.3388E-8 | 640849 | 1.8403E-9 | 718470  | 1.5778E-8  |
| 91465  | 3.4296E-8 | 91465  | 3.3427E-8 | 649432 | 1.7386E-9 | 728075  | 7.5477E-9  |
| 92486  | 3.4314E-8 | 92486  | 3.3456E-8 | 658015 | 1.6441E-9 | 737679  | 5.3175E-9  |
| 93508  | 3.4243E-8 | 93508  | 3.3351E-8 | 666598 | 1.5523E-9 | 746262  | 4.1265E-9  |
| 94529  | 3.4243E-8 | 94529  | 3.3419E-8 | 675181 | 1.4536E-9 | 754845  | 3.3415E-9  |
| 95551  | 3.4339E-8 | 95551  | 3.3402E-8 | 683764 | 1.3806E-9 | 763428  | 2.7995E-9  |
| 96572  | 3.4242E-8 | 96572  | 3.3422E-8 | 692347 | 1.3418E-9 | 772011  | 2.4555E-9  |
| 97594  | 3.4241E-8 | 97594  | 3.3417E-8 | 700930 | 1.2976E-9 | 780594  | 2.1381E-9  |
| 98615  | 3.4241E-8 | 98615  | 3.3438E-8 | 711595 | 1.0829E-7 | 789178  | 1.919E-9   |
| 99636  | 3.4253E-8 | 99637  | 3.3427E-8 | 717300 | 1.1312E-7 | 797761  | 1.7728E-9  |
| 100658 | 3.424E-8  | 100658 | 3.3402E-8 | 719903 | 7.5557E-8 | 806344  | 1.645E-9   |
| 101679 | 3.4242E-8 | 101680 | 3.3392E-8 | 723528 | 4.3919E-8 | 814927  | 1.5172E-9  |
| 102701 | 3.4281E-8 | 102701 | 3.3363E-8 | 726631 | 2.9251E-8 | 823510  | 1.432E-9   |
| 103722 | 3.4157E-8 | 103723 | 3.3392E-8 | 729734 | 2.1408E-8 | 832093  | 1.2953E-9  |
| 104744 | 3.4118E-8 | 104744 | 3.3388E-8 | 732837 | 1.6671E-8 | 840676  | 1.2445E-9  |
| 105765 | 3.4223E-8 | 105766 | 3.3411E-8 | 742441 | 9.7438E-9 | 849259  | 1.1898E-9  |
| 106787 | 3.415E-8  | 106787 | 3.3354E-8 | 749964 | 6.821E-9  | 857842  | 1.1327E-9  |
| 107808 | 3.4138E-8 | 107809 | 3.3382E-8 | 759568 | 5.3621E-9 | 866425  | 1.0653E-9  |
| 108830 | 3.541E-8  | 108830 | 3.3413E-8 | 768152 | 4.3994E-9 | 875008  | 1.023E-9   |
| 109851 | 3.297E-8  | 109852 | 3.3388E-8 | 776735 | 3.7314E-9 | 883592  | 9.9223E-10 |
| 110873 | 3.3336E-8 | 110873 | 3.3423E-8 | 785318 | 3.2507E-9 | 892175  | 1.9074E-9  |
| 111894 | 4.1631E-8 | 111895 | 3.3335E-8 | 793901 | 2.888E-9  | 902839  | 3.0029E-8  |
| 112916 | 4.1604E-8 | 112916 | 3.3375E-8 | 802484 | 2.6545E-9 | 908023  | 2.8601E-8  |
| 113937 | 4.7745E-8 | 113938 | 3.3449E-8 | 811067 | 2.4118E-9 | 911126  | 2.2105E-8  |
| 114959 | 5.8236E-8 | 114959 | 3.3354E-8 | 819650 | 2.2191E-9 | 914229  | 1.6219E-8  |
| 115980 | 6.1905E-8 | 115981 | 3.342E-8  | 828233 | 2.0302E-9 | 923834  | 7.6974E-9  |
| 117002 | 6.2753E-8 | 117002 | 3.3379E-8 | 836816 | 1.8829E-9 | 933438  | 5.395E-9   |
| 118023 | 6.3015E-8 | 118024 | 3.3376E-8 | 845399 | 1.7471E-9 | 942021  | 4.1733E-9  |
| 119045 | 6.3199E-8 | 119045 | 3.335E-8  | 853983 | 1.6669E-9 | 950604  | 3.3592E-9  |
| 120066 | 6.2845E-8 | 120067 | 3.3445E-8 | 862566 | 1.5842E-9 | 959187  | 2.8517E-9  |
| 121088 | 5.4566E-8 | 121088 | 3.3162E-8 | 871149 | 1.5148E-9 | 967770  | 2.4517E-9  |
| 122109 | 4.3616E-8 | 122110 | 3.1327E-8 | 879732 | 1.4377E-9 | 976354  | 2.1883E-9  |
| 123131 | 3.8787E-8 | 123131 | 3.2499E-8 | 888315 | 1.392E-9  | 984937  | 1.9529E-9  |
| 124152 | 3.7355E-8 | 124153 | 3.3872E-8 | 896898 | 1.339E-9  | 993520  | 1.7924E-9  |
| 125174 | 3.6975E-8 | 125174 | 3.4591E-8 | 907563 | 1.0904E-7 | 1002103 | 1.8279E-9  |
| 126195 | 3.6796E-8 | 126196 | 3.4759E-8 | 913268 | 1.1388E-7 | 1010686 | 1.7502E-9  |
| 127217 | 3.6594E-8 | 127217 | 3.4751E-8 | 915871 | 9.2156E-8 | 1019269 | 1.6663E-9  |
| 128238 | 3.6579E-8 | 128239 | 3.4776E-8 | 918474 | 4.8647E-8 | 1027852 | 1.5681E-9  |
| 129260 | 3.6524E-8 | 129260 | 3.4825E-8 | 922098 | 3.1477E-8 |         |            |
| 130281 | 3.6398E-8 | 130282 | 3.4802E-8 | 925201 | 2.2675E-8 |         |            |

|        |           |        |           |         |           |  |  |
|--------|-----------|--------|-----------|---------|-----------|--|--|
| 131303 | 3.6348E-8 | 131303 | 3.4788E-8 | 928304  | 1.7501E-8 |  |  |
| 132324 | 3.6291E-8 | 132325 | 3.4939E-8 | 937909  | 1.0095E-8 |  |  |
| 133346 | 3.6282E-8 | 133346 | 3.4816E-8 | 945432  | 7.0203E-9 |  |  |
| 134367 | 3.6316E-8 | 134368 | 3.5085E-8 | 955036  | 5.4988E-9 |  |  |
| 135389 | 3.6243E-8 | 135389 | 3.5367E-8 | 963619  | 4.4936E-9 |  |  |
| 136410 | 3.6189E-8 | 136411 | 3.5411E-8 | 972203  | 3.8032E-9 |  |  |
| 137432 | 3.6152E-8 | 137432 | 3.5464E-8 | 980786  | 3.3339E-9 |  |  |
| 138453 | 3.6159E-8 | 138454 | 3.5509E-8 | 989369  | 2.988E-9  |  |  |
| 139475 | 3.6042E-8 | 139475 | 3.5532E-8 | 997952  | 2.6622E-9 |  |  |
| 140496 | 3.6067E-8 | 140497 | 3.5542E-8 | 1006535 | 2.6305E-9 |  |  |
| 141518 | 3.6054E-8 | 141518 | 3.5495E-8 | 1015118 | 2.5666E-9 |  |  |
| 142539 | 3.6009E-8 | 142540 | 3.5489E-8 | 1023701 | 2.4346E-9 |  |  |
| 143561 | 3.6034E-8 | 143561 | 3.5458E-8 |         |           |  |  |
| 144582 | 3.5995E-8 | 144583 | 3.5499E-8 |         |           |  |  |
| 145604 | 3.5982E-8 | 145604 | 3.5499E-8 |         |           |  |  |
| 146625 | 3.5893E-8 | 146626 | 3.5464E-8 |         |           |  |  |
| 147647 | 3.584E-8  | 147647 | 3.5388E-8 |         |           |  |  |
| 148668 | 3.5821E-8 | 148669 | 3.5427E-8 |         |           |  |  |
| 149690 | 3.5798E-8 | 149690 | 3.5357E-8 |         |           |  |  |
| 150711 | 3.579E-8  | 150712 | 3.5378E-8 |         |           |  |  |
| 151733 | 3.5764E-8 | 151733 | 3.5447E-8 |         |           |  |  |
| 152754 | 3.5717E-8 | 152755 | 3.5305E-8 |         |           |  |  |
| 153776 | 3.5747E-8 | 153776 | 3.5299E-8 |         |           |  |  |
| 154797 | 3.5626E-8 | 154798 | 3.5332E-8 |         |           |  |  |
| 155819 | 3.5735E-8 | 155819 | 3.5292E-8 |         |           |  |  |
| 156840 | 3.5631E-8 | 156841 | 3.5196E-8 |         |           |  |  |
| 157862 | 3.554E-8  | 157862 | 3.5246E-8 |         |           |  |  |
| 158883 | 3.564E-8  | 158883 | 3.5179E-8 |         |           |  |  |
| 159905 | 3.5533E-8 | 159905 | 3.5122E-8 |         |           |  |  |
| 160926 | 3.5524E-8 | 160927 | 3.5144E-8 |         |           |  |  |
| 161948 | 3.5472E-8 | 161948 | 3.5135E-8 |         |           |  |  |
| 162969 | 3.554E-8  | 162970 | 3.5083E-8 |         |           |  |  |
| 163991 | 3.5405E-8 | 163991 | 3.509E-8  |         |           |  |  |
| 165012 | 3.5449E-8 | 165013 | 3.5032E-8 |         |           |  |  |
| 166033 | 3.5409E-8 | 166034 | 3.497E-8  |         |           |  |  |
| 167055 | 3.5425E-8 | 167056 | 3.4976E-8 |         |           |  |  |
| 168076 | 3.5339E-8 | 168077 | 3.4969E-8 |         |           |  |  |
| 169098 | 3.5286E-8 | 169099 | 3.4888E-8 |         |           |  |  |
| 170119 | 3.5343E-8 | 170120 | 3.4868E-8 |         |           |  |  |
| 171141 | 3.5281E-8 | 171142 | 3.4943E-8 |         |           |  |  |
| 172162 | 3.5216E-8 | 172163 | 3.4821E-8 |         |           |  |  |

|        |           |        |           |
|--------|-----------|--------|-----------|
| 173184 | 3.527E-8  | 173185 | 3.4704E-8 |
| 174205 | 3.5192E-8 | 174206 | 3.4855E-8 |
| 175227 | 3.5204E-8 | 175228 | 3.4807E-8 |
| 176248 | 3.5187E-8 | 176249 | 3.4806E-8 |
| 177270 | 3.5226E-8 | 177270 | 3.4714E-8 |
| 178291 | 3.514E-8  | 178292 | 3.4728E-8 |
| 179313 | 3.5086E-8 | 179313 | 3.4665E-8 |
| 180334 | 3.5119E-8 | 180335 | 3.4632E-8 |
| 181356 | 3.506E-8  | 181356 | 3.468E-8  |
| 182377 | 3.4984E-8 | 182378 | 3.47E-8   |
| 183399 | 3.5068E-8 | 183399 | 3.4611E-8 |
| 184420 | 3.5085E-8 | 184421 | 3.4648E-8 |
| 185442 | 3.4998E-8 | 185442 | 3.4538E-8 |
| 186463 | 3.5016E-8 | 186464 | 3.4546E-8 |
| 187485 | 3.4899E-8 | 187485 | 3.4473E-8 |
| 188506 | 3.4961E-8 | 188507 | 3.4593E-8 |
| 189528 | 3.4966E-8 | 189528 | 3.4483E-8 |
| 190549 | 3.4884E-8 | 190550 | 3.4425E-8 |
| 191571 | 3.4899E-8 | 191571 | 3.4571E-8 |
| 192592 | 3.4885E-8 | 192593 | 3.4396E-8 |
| 193614 | 3.4945E-8 | 193614 | 3.439E-8  |
| 194635 | 3.4881E-8 | 194636 | 3.4388E-8 |
| 195657 | 3.4814E-8 | 195657 | 3.4366E-8 |
| 196678 | 3.4895E-8 | 196679 | 3.4329E-8 |
| 197700 | 3.4746E-8 | 197700 | 3.431E-8  |
| 198721 | 3.4786E-8 | 198722 | 3.4315E-8 |
| 199743 | 3.4805E-8 | 199743 | 3.4239E-8 |
| 200764 | 3.4788E-8 | 200765 | 3.4284E-8 |
| 201786 | 3.4757E-8 | 201787 | 3.4163E-8 |
| 202807 | 3.4763E-8 | 202808 | 3.4292E-8 |
| 203829 | 3.4722E-8 | 203830 | 3.42E-8   |
| 204850 | 3.4683E-8 | 204851 | 3.4177E-8 |
| 205872 | 3.4776E-8 | 205873 | 3.4197E-8 |
| 206893 | 3.4682E-8 | 206894 | 3.415E-8  |
| 207915 | 3.471E-8  | 207916 | 3.4193E-8 |
| 208936 | 3.4689E-8 | 208937 | 3.4161E-8 |
| 209958 | 3.4702E-8 | 209959 | 3.4124E-8 |
| 210979 | 3.4694E-8 | 210980 | 3.4083E-8 |
| 212001 | 3.4632E-8 | 212001 | 3.4091E-8 |
| 213022 | 3.4666E-8 | 213023 | 3.4111E-8 |
| 214044 | 3.4556E-8 | 214044 | 3.411E-8  |

|        |           |        |           |
|--------|-----------|--------|-----------|
| 215065 | 3.4574E-8 | 215066 | 3.4027E-8 |
| 216087 | 3.4688E-8 | 216088 | 3.4076E-8 |
| 217108 | 3.4558E-8 | 217109 | 3.4058E-8 |
| 218130 | 3.4541E-8 | 218130 | 3.3976E-8 |
| 219151 | 3.4536E-8 | 219152 | 3.4117E-8 |
| 220173 | 3.4556E-8 | 220173 | 3.3969E-8 |
| 221194 | 3.4499E-8 | 221195 | 3.3917E-8 |
| 222216 | 3.4584E-8 | 222217 | 3.3997E-8 |
| 223237 | 3.4524E-8 | 223238 | 3.3935E-8 |
| 224259 | 3.4525E-8 | 224260 | 3.3892E-8 |
| 225280 | 3.4521E-8 | 225281 | 3.3974E-8 |
| 226302 | 3.4515E-8 | 226303 | 3.3946E-8 |
| 227323 | 3.4476E-8 | 227324 | 3.3963E-8 |
| 228345 | 3.447E-8  | 228346 | 3.3947E-8 |
| 229366 | 3.4546E-8 | 229367 | 3.3991E-8 |
| 230388 | 3.4476E-8 | 230389 | 3.395E-8  |
| 231409 | 3.4458E-8 | 231410 | 3.3863E-8 |
| 232431 | 3.4481E-8 | 232432 | 3.3935E-8 |
| 233452 | 3.4446E-8 | 233453 | 3.3839E-8 |
| 234474 | 3.4353E-8 | 234475 | 3.3895E-8 |
| 235495 | 3.4443E-8 | 235496 | 3.3861E-8 |
| 236517 | 3.4409E-8 | 236517 | 3.3889E-8 |
| 237538 | 3.444E-8  | 237539 | 3.3879E-8 |
| 238560 | 3.4351E-8 | 238560 | 3.3842E-8 |
| 239581 | 3.4415E-8 | 239582 | 3.3866E-8 |
| 240603 | 3.4364E-8 | 240603 | 3.3823E-8 |
| 241624 | 3.4285E-8 | 241625 | 3.3793E-8 |
| 242646 | 3.4419E-8 | 242646 | 3.3884E-8 |
| 243667 | 3.4253E-8 | 243668 | 3.3831E-8 |
| 244689 | 3.4322E-8 | 244689 | 3.3773E-8 |
| 245710 | 3.4302E-8 | 245711 | 3.3853E-8 |
| 246732 | 3.4319E-8 | 246732 | 3.3788E-8 |
| 247753 | 3.4304E-8 | 247754 | 3.3754E-8 |
| 248775 | 3.4283E-8 | 248776 | 3.3787E-8 |
| 249796 | 3.4326E-8 | 249797 | 3.3804E-8 |
| 250818 | 3.4243E-8 | 250819 | 3.381E-8  |
| 251839 | 3.4208E-8 | 251840 | 3.3693E-8 |
| 252861 | 3.43E-8   | 252862 | 3.3763E-8 |
| 253882 | 3.4223E-8 | 253883 | 3.3726E-8 |
| 254904 | 3.4229E-8 | 254905 | 3.371E-8  |
| 255925 | 3.4183E-8 | 255926 | 3.3716E-8 |

|        |           |        |           |
|--------|-----------|--------|-----------|
| 256947 | 3.4219E-8 | 256948 | 3.3796E-8 |
| 257968 | 3.4224E-8 | 257969 | 3.3671E-8 |
| 258990 | 3.4136E-8 | 258990 | 3.377E-8  |
| 260011 | 3.4219E-8 | 260012 | 3.3695E-8 |
| 261032 | 3.4236E-8 | 261033 | 3.3705E-8 |
| 262054 | 3.4205E-8 | 262055 | 3.3683E-8 |
| 263076 | 3.4156E-8 | 263077 | 3.3776E-8 |
| 264097 | 3.4188E-8 | 264098 | 3.3668E-8 |
| 265119 | 3.4221E-8 | 265120 | 3.3705E-8 |
| 266140 | 3.4214E-8 | 266141 | 3.3668E-8 |
| 267162 | 3.419E-8  | 267162 | 3.3658E-8 |
| 268183 | 3.4123E-8 | 268184 | 3.3693E-8 |
| 269205 | 3.4116E-8 | 269206 | 3.3651E-8 |
| 270226 | 3.416E-8  | 270227 | 3.3639E-8 |
| 271248 | 3.412E-8  | 271249 | 3.3667E-8 |
| 272269 | 3.4181E-8 | 272270 | 3.3674E-8 |
| 273291 | 3.417E-8  | 273291 | 3.366E-8  |
| 274312 | 3.4104E-8 | 274313 | 3.3583E-8 |
| 275334 | 3.4085E-8 | 275334 | 3.3672E-8 |
| 276355 | 3.4093E-8 | 276356 | 3.3599E-8 |
| 277376 | 3.4077E-8 | 277378 | 3.3611E-8 |
| 278398 | 3.4085E-8 | 278399 | 3.3624E-8 |
| 279419 | 3.403E-8  | 279421 | 3.3622E-8 |
| 280441 | 3.4032E-8 | 280442 | 3.3639E-8 |
| 281462 | 3.4139E-8 | 281464 | 3.3564E-8 |
| 282484 | 3.3995E-8 | 282485 | 3.3553E-8 |
| 283505 | 3.412E-8  | 283507 | 3.3676E-8 |
| 284527 | 3.4062E-8 | 284528 | 3.3511E-8 |
| 285548 | 3.4014E-8 | 285550 | 3.3562E-8 |
| 286570 | 3.4015E-8 | 286571 | 3.3585E-8 |
| 287591 | 3.4095E-8 | 287593 | 3.3582E-8 |
| 288613 | 3.3948E-8 | 288614 | 3.3504E-8 |
| 289634 | 3.3983E-8 | 289636 | 3.3648E-8 |
| 290656 | 3.4077E-8 | 290657 | 3.3525E-8 |
| 291677 | 3.3952E-8 | 291679 | 3.3525E-8 |
| 292699 | 3.3993E-8 | 292700 | 3.355E-8  |
| 293720 | 3.3997E-8 | 293721 | 3.3534E-8 |
| 294742 | 3.4019E-8 | 294743 | 3.3478E-8 |
| 295763 | 3.3995E-8 | 295764 | 3.3613E-8 |
| 296785 | 3.4028E-8 | 296786 | 3.3607E-8 |
| 297806 | 3.405E-8  | 297807 | 3.3478E-8 |

|        |           |        |           |
|--------|-----------|--------|-----------|
| 298828 | 3.3944E-8 | 298829 | 3.3533E-8 |
| 299850 | 3.3961E-8 | 299850 | 3.3597E-8 |
| 300871 | 3.3995E-8 | 300872 | 3.3617E-8 |
| 301893 | 3.3969E-8 | 301893 | 3.3499E-8 |
| 302914 | 3.3917E-8 | 302915 | 3.3527E-8 |
| 303936 | 3.3952E-8 | 303937 | 3.3529E-8 |
| 304957 | 3.5235E-8 | 304958 | 3.351E-8  |
| 305978 | 3.2498E-8 | 305980 | 3.3578E-8 |
| 307000 | 3.3361E-8 | 307001 | 3.3505E-8 |
| 308022 | 4.1321E-8 | 308023 | 3.3485E-8 |
| 309043 | 4.102E-8  | 309044 | 3.3492E-8 |
| 310065 | 4.7938E-8 | 310066 | 3.3507E-8 |
| 311086 | 5.8103E-8 | 311087 | 3.3516E-8 |
| 312108 | 6.1303E-8 | 312109 | 3.3448E-8 |
| 313129 | 6.2081E-8 | 313130 | 3.3495E-8 |
| 314151 | 6.2425E-8 | 314152 | 3.3474E-8 |
| 315172 | 6.2498E-8 | 315173 | 3.3482E-8 |
| 316194 | 6.2116E-8 | 316195 | 3.3672E-8 |
| 317215 | 5.3284E-8 | 317216 | 3.3044E-8 |
| 318237 | 4.2573E-8 | 318238 | 3.134E-8  |
| 319258 | 3.8094E-8 | 319259 | 3.2524E-8 |
| 320280 | 3.683E-8  | 320281 | 3.3791E-8 |
| 321301 | 3.652E-8  | 321302 | 3.4522E-8 |
| 322323 | 3.6224E-8 | 322324 | 3.4687E-8 |
| 323345 | 3.6183E-8 | 323345 | 3.4782E-8 |
| 324366 | 3.6045E-8 | 324367 | 3.4622E-8 |
| 325388 | 3.6026E-8 | 325388 | 3.463E-8  |
| 326409 | 3.6018E-8 | 326410 | 3.485E-8  |
| 327431 | 3.5847E-8 | 327431 | 3.4729E-8 |
| 328452 | 3.5925E-8 | 328453 | 3.474E-8  |
| 329474 | 3.5858E-8 | 329474 | 3.4851E-8 |
| 330495 | 3.5794E-8 | 330496 | 3.5057E-8 |
| 331517 | 3.5817E-8 | 331517 | 3.5329E-8 |
| 332538 | 3.5786E-8 | 332539 | 3.5447E-8 |
| 333560 | 3.571E-8  | 333560 | 3.5409E-8 |
| 334581 | 3.5661E-8 | 334582 | 3.5462E-8 |
| 335603 | 3.5663E-8 | 335603 | 3.5439E-8 |
| 336624 | 3.5575E-8 | 336625 | 3.5419E-8 |
| 337646 | 3.5536E-8 | 337646 | 3.5436E-8 |
| 338667 | 3.5618E-8 | 338668 | 3.5403E-8 |
| 339689 | 3.5569E-8 | 339690 | 3.5412E-8 |

|        |           |        |           |
|--------|-----------|--------|-----------|
| 340710 | 3.5452E-8 | 340711 | 3.5408E-8 |
| 341732 | 3.544E-8  | 341733 | 3.5464E-8 |
| 342753 | 3.552E-8  | 342754 | 3.5398E-8 |
| 343775 | 3.5399E-8 | 343776 | 3.5327E-8 |
| 344796 | 3.5345E-8 | 344797 | 3.5387E-8 |
| 345818 | 3.5418E-8 | 345819 | 3.5325E-8 |
| 346839 | 3.5372E-8 | 346840 | 3.5334E-8 |
| 347861 | 3.5248E-8 | 347862 | 3.5329E-8 |
| 348882 | 3.5278E-8 | 348883 | 3.5317E-8 |
| 349904 | 3.5319E-8 | 349905 | 3.5218E-8 |
| 350926 | 3.5222E-8 | 350926 | 3.5311E-8 |
| 351947 | 3.5282E-8 | 351948 | 3.5218E-8 |
| 352969 | 3.5266E-8 | 352969 | 3.5246E-8 |
| 353990 | 3.5167E-8 | 353991 | 3.5217E-8 |
| 355012 | 3.5176E-8 | 355012 | 3.52E-8   |
| 356033 | 3.5198E-8 | 356034 | 3.5219E-8 |
| 357055 | 3.5132E-8 | 357055 | 3.5099E-8 |
| 358076 | 3.5031E-8 | 358077 | 3.5019E-8 |
| 359098 | 3.5069E-8 | 359098 | 3.5176E-8 |
| 360119 | 3.5027E-8 | 360120 | 3.5087E-8 |
| 361141 | 3.496E-8  | 361141 | 3.5055E-8 |
| 362162 | 3.4944E-8 | 362163 | 3.5107E-8 |
| 363184 | 3.4999E-8 | 363184 | 3.4954E-8 |
| 364205 | 3.4905E-8 | 364206 | 3.4922E-8 |
| 365227 | 3.4882E-8 | 365227 | 3.5057E-8 |
| 366248 | 3.4884E-8 | 366249 | 3.4906E-8 |
| 367270 | 3.492E-8  | 367270 | 3.4915E-8 |
| 368291 | 3.4884E-8 | 368292 | 3.4845E-8 |
| 369313 | 3.4831E-8 | 369313 | 3.4884E-8 |
| 370334 | 3.4854E-8 | 370335 | 3.4854E-8 |
| 371356 | 3.4818E-8 | 371356 | 3.4769E-8 |
| 372377 | 3.4731E-8 | 372378 | 3.4709E-8 |
| 373399 | 3.4723E-8 | 373399 | 3.4787E-8 |
| 374420 | 3.4713E-8 | 374421 | 3.4767E-8 |
| 375442 | 3.4724E-8 | 375442 | 3.4678E-8 |
| 376463 | 3.4735E-8 | 376464 | 3.4807E-8 |
| 377485 | 3.479E-8  | 377485 | 3.4655E-8 |
| 378506 | 3.4687E-8 | 378507 | 3.454E-8  |
| 379528 | 3.4579E-8 | 379528 | 3.4639E-8 |
| 380549 | 3.4562E-8 | 380550 | 3.4628E-8 |
| 381571 | 3.4675E-8 | 381571 | 3.4591E-8 |

|        |           |        |           |
|--------|-----------|--------|-----------|
| 382592 | 3.455E-8  | 382593 | 3.4599E-8 |
| 383614 | 3.4545E-8 | 383614 | 3.4493E-8 |
| 384635 | 3.4609E-8 | 384636 | 3.4538E-8 |
| 385657 | 3.4493E-8 | 385657 | 3.4546E-8 |
| 386678 | 3.4572E-8 | 386679 | 3.4446E-8 |
| 387700 | 3.4564E-8 | 387700 | 3.4476E-8 |
| 388721 | 3.462E-8  | 388722 | 3.4456E-8 |
| 389743 | 3.4478E-8 | 389743 | 3.4369E-8 |
| 390764 | 3.4496E-8 | 390765 | 3.4377E-8 |
| 391786 | 3.4529E-8 | 391786 | 3.4396E-8 |
| 392807 | 3.4399E-8 | 392808 | 3.4353E-8 |
| 393829 | 3.4449E-8 | 393829 | 3.4314E-8 |
| 394850 | 3.4435E-8 | 394851 | 3.4316E-8 |
| 395872 | 3.4452E-8 | 395872 | 3.4263E-8 |
| 396893 | 3.4424E-8 | 396894 | 3.4295E-8 |
| 397915 | 3.4475E-8 | 397915 | 3.4283E-8 |
| 398936 | 3.4437E-8 | 398937 | 3.4179E-8 |
| 399958 | 3.44E-8   | 399958 | 3.4206E-8 |
| 400979 | 3.4386E-8 | 400980 | 3.421E-8  |
| 402001 | 3.4327E-8 | 402001 | 3.4219E-8 |
| 403022 | 3.4418E-8 | 403023 | 3.4149E-8 |
| 404044 | 3.4328E-8 | 404044 | 3.4191E-8 |
| 405065 | 3.4365E-8 | 405066 | 3.4117E-8 |
| 406087 | 3.444E-8  | 406087 | 3.3983E-8 |
| 407108 | 3.4373E-8 | 407109 | 3.4201E-8 |
| 408130 | 3.4321E-8 | 408130 | 3.413E-8  |
| 409151 | 3.43E-8   | 409152 | 3.4097E-8 |
| 410173 | 3.4304E-8 | 410173 | 3.41E-8   |
| 411195 | 3.4261E-8 | 411195 | 3.4101E-8 |
| 412216 | 3.4255E-8 | 412216 | 3.4024E-8 |
| 413238 | 3.4324E-8 | 413238 | 3.4036E-8 |
| 414259 | 3.4232E-8 | 414259 | 3.4074E-8 |
| 415281 | 3.4275E-8 | 415281 | 3.4021E-8 |
| 416302 | 3.4231E-8 | 416302 | 3.4019E-8 |
| 417324 | 3.4292E-8 | 417324 | 3.4081E-8 |
| 418345 | 3.4194E-8 | 418345 | 3.4036E-8 |
| 419367 | 3.4159E-8 | 419367 | 3.3945E-8 |
| 420388 | 3.4284E-8 | 420388 | 3.4085E-8 |
| 421410 | 3.4254E-8 | 421410 | 3.4007E-8 |
| 422431 | 3.4213E-8 | 422431 | 3.3957E-8 |
| 423453 | 3.4196E-8 | 423453 | 3.405E-8  |

|        |           |        |           |
|--------|-----------|--------|-----------|
| 424474 | 3.4232E-8 | 424474 | 3.3909E-8 |
| 425496 | 3.4165E-8 | 425496 | 3.401E-8  |
| 426517 | 3.4172E-8 | 426517 | 3.398E-8  |
| 427539 | 3.4212E-8 | 427539 | 3.3984E-8 |
| 428560 | 3.4139E-8 | 428560 | 3.3922E-8 |
| 429582 | 3.413E-8  | 429582 | 3.3972E-8 |
| 430603 | 3.4151E-8 | 430603 | 3.3956E-8 |
| 431625 | 3.4079E-8 | 431625 | 3.3907E-8 |
| 432646 | 3.4108E-8 | 432646 | 3.3942E-8 |
| 433668 | 3.4144E-8 | 433668 | 3.3928E-8 |
| 434689 | 3.4135E-8 | 434689 | 3.3934E-8 |
| 435711 | 3.4023E-8 | 435711 | 3.39E-8   |
| 436732 | 3.4089E-8 | 436732 | 3.3926E-8 |
| 437754 | 3.407E-8  | 437754 | 3.3801E-8 |
| 438775 | 3.407E-8  | 438775 | 3.391E-8  |
| 439797 | 3.4052E-8 | 439797 | 3.3876E-8 |
| 440819 | 3.4021E-8 | 440818 | 3.3851E-8 |
| 441840 | 3.4016E-8 | 441840 | 3.3886E-8 |
| 442862 | 3.4057E-8 | 442861 | 3.3781E-8 |
| 443883 | 3.4075E-8 | 443883 | 3.3867E-8 |
| 444905 | 3.4078E-8 | 444904 | 3.3798E-8 |
| 445926 | 3.4081E-8 | 445926 | 3.3825E-8 |
| 446948 | 3.4015E-8 | 446947 | 3.3892E-8 |
| 447969 | 3.4045E-8 | 447969 | 3.3772E-8 |
| 448991 | 3.399E-8  | 448990 | 3.3812E-8 |
| 450012 | 3.3972E-8 | 450012 | 3.3883E-8 |
| 451034 | 3.4025E-8 | 451033 | 3.3771E-8 |
| 452055 | 3.3931E-8 | 452055 | 3.3711E-8 |
| 453077 | 3.4009E-8 | 453076 | 3.3825E-8 |
| 454098 | 3.4005E-8 | 454098 | 3.3727E-8 |
| 455120 | 3.3931E-8 | 455119 | 3.3698E-8 |
| 456141 | 3.4053E-8 | 456141 | 3.3847E-8 |
| 457163 | 3.3892E-8 | 457162 | 3.3747E-8 |
| 458184 | 3.3927E-8 | 458184 | 3.3679E-8 |
| 459205 | 3.3985E-8 | 459205 | 3.3832E-8 |
| 460227 | 3.3921E-8 | 460227 | 3.3718E-8 |
| 461249 | 3.3919E-8 | 461248 | 3.3676E-8 |
| 462270 | 3.4001E-8 | 462270 | 3.3798E-8 |
| 463292 | 3.3905E-8 | 463291 | 3.3761E-8 |
| 464313 | 3.39E-8   | 464313 | 3.3794E-8 |
| 465335 | 3.3864E-8 | 465334 | 3.3694E-8 |

|        |           |        |           |
|--------|-----------|--------|-----------|
| 466356 | 3.3882E-8 | 466356 | 3.3716E-8 |
| 467378 | 3.392E-8  | 467377 | 3.3704E-8 |
| 468399 | 3.3904E-8 | 468399 | 3.3759E-8 |
| 469421 | 3.3885E-8 | 469420 | 3.3656E-8 |
| 470442 | 3.3832E-8 | 470442 | 3.3647E-8 |
| 471464 | 3.3842E-8 | 471463 | 3.3656E-8 |
| 472485 | 3.384E-8  | 472485 | 3.3646E-8 |
| 473507 | 3.3896E-8 | 473506 | 3.3678E-8 |
| 474528 | 3.3884E-8 | 474528 | 3.3716E-8 |
| 475550 | 3.3885E-8 | 475549 | 3.3675E-8 |
| 476571 | 3.3847E-8 | 476571 | 3.3651E-8 |
| 477593 | 3.3849E-8 | 477592 | 3.3612E-8 |
| 478614 | 3.3825E-8 | 478613 | 3.3679E-8 |
| 479636 | 3.3804E-8 | 479635 | 3.3586E-8 |
| 480657 | 3.3857E-8 | 480657 | 3.3515E-8 |
| 481679 | 3.3836E-8 | 481678 | 3.365E-8  |
| 482700 | 3.3806E-8 | 482700 | 3.3599E-8 |
| 483722 | 3.3884E-8 | 483721 | 3.3601E-8 |
| 484743 | 3.3786E-8 | 484743 | 3.3659E-8 |
| 485765 | 3.3768E-8 | 485764 | 3.3612E-8 |
| 486786 | 3.3905E-8 | 486786 | 3.3637E-8 |
| 487808 | 3.3751E-8 | 487807 | 3.3671E-8 |
| 488829 | 3.3803E-8 | 488829 | 3.3667E-8 |
| 489851 | 3.3809E-8 | 489850 | 3.3599E-8 |
| 490872 | 3.3764E-8 | 490872 | 3.3609E-8 |
| 491894 | 3.38E-8   | 491893 | 3.3566E-8 |
| 492915 | 3.3815E-8 | 492915 | 3.3549E-8 |
| 493937 | 3.3751E-8 | 493936 | 3.3595E-8 |
| 494958 | 3.3772E-8 | 494958 | 3.3621E-8 |
| 495980 | 3.3754E-8 | 495979 | 3.3577E-8 |
| 497001 | 3.3787E-8 | 497000 | 3.3574E-8 |
| 498023 | 3.3702E-8 | 498022 | 3.354E-8  |
| 499044 | 3.3681E-8 | 499043 | 3.3561E-8 |
| 500066 | 3.3763E-8 | 500065 | 3.3509E-8 |
| 501087 | 3.5063E-8 | 501086 | 3.3501E-8 |
| 502109 | 3.219E-8  | 502108 | 3.3585E-8 |
| 503130 | 3.3026E-8 | 503129 | 3.354E-8  |
| 504152 | 4.0732E-8 | 504151 | 3.3535E-8 |
| 505173 | 4.0606E-8 | 505172 | 3.3553E-8 |
| 506195 | 4.8056E-8 | 506194 | 3.3529E-8 |
| 507216 | 5.7775E-8 | 507215 | 3.3482E-8 |

|        |           |        |           |
|--------|-----------|--------|-----------|
| 508238 | 6.0799E-8 | 508237 | 3.3499E-8 |
| 509259 | 6.1622E-8 | 509258 | 3.3548E-8 |
| 510281 | 6.186E-8  | 510280 | 3.3513E-8 |
| 511302 | 6.1966E-8 | 511301 | 3.3431E-8 |
| 512324 | 6.1574E-8 | 512323 | 3.3855E-8 |
| 513345 | 5.267E-8  | 513345 | 3.2853E-8 |
| 514367 | 4.2051E-8 | 514366 | 3.1226E-8 |
| 515388 | 3.7789E-8 | 515388 | 3.2535E-8 |
| 516410 | 3.6582E-8 | 516409 | 3.384E-8  |
| 517431 | 3.6116E-8 | 517431 | 3.4518E-8 |
| 518453 | 3.5956E-8 | 518452 | 3.4667E-8 |
| 519474 | 3.581E-8  | 519474 | 3.4702E-8 |
| 520496 | 3.5759E-8 | 520495 | 3.4627E-8 |
| 521517 | 3.5775E-8 | 521517 | 3.4749E-8 |
| 522539 | 3.563E-8  | 522538 | 3.4727E-8 |
| 523560 | 3.5546E-8 | 523560 | 3.4739E-8 |
| 524582 | 3.5536E-8 | 524581 | 3.471E-8  |
| 525603 | 3.5533E-8 | 525603 | 3.4773E-8 |
| 526625 | 3.5519E-8 | 526624 | 3.4991E-8 |
| 527647 | 3.5485E-8 | 527646 | 3.5265E-8 |
| 528668 | 3.5427E-8 | 528667 | 3.5343E-8 |
| 529690 | 3.5382E-8 | 529689 | 3.5398E-8 |
| 530711 | 3.5344E-8 | 530710 | 3.5351E-8 |
| 531733 | 3.5361E-8 | 531732 | 3.5502E-8 |
| 532754 | 3.532E-8  | 532753 | 3.5439E-8 |
| 533776 | 3.5233E-8 | 533775 | 3.5414E-8 |
| 534797 | 3.5358E-8 | 534796 | 3.544E-8  |
| 535819 | 3.5233E-8 | 535818 | 3.5387E-8 |
| 536840 | 3.513E-8  | 536839 | 3.5343E-8 |
| 537862 | 3.5275E-8 | 537861 | 3.5386E-8 |
| 538883 | 3.5163E-8 | 538882 | 3.5425E-8 |
| 539904 | 3.5146E-8 | 539904 | 3.5329E-8 |
| 540926 | 3.517E-8  | 540925 | 3.5274E-8 |
| 541947 | 3.5074E-8 | 541947 | 3.5272E-8 |
| 542969 | 3.5044E-8 | 542968 | 3.5263E-8 |
| 543990 | 3.5112E-8 | 543990 | 3.5312E-8 |
| 545012 | 3.5081E-8 | 545011 | 3.5257E-8 |
| 546033 | 3.4944E-8 | 546033 | 3.5304E-8 |
| 547055 | 3.5015E-8 | 547054 | 3.5166E-8 |
| 548076 | 3.5014E-8 | 548076 | 3.5163E-8 |
| 549098 | 3.4915E-8 | 549097 | 3.5162E-8 |

|        |           |        |           |
|--------|-----------|--------|-----------|
| 550119 | 3.4911E-8 | 550119 | 3.517E-8  |
| 551141 | 3.4859E-8 | 551140 | 3.5159E-8 |
| 552162 | 3.4821E-8 | 552162 | 3.5104E-8 |
| 553184 | 3.4835E-8 | 553183 | 3.5093E-8 |
| 554205 | 3.4805E-8 | 554205 | 3.5048E-8 |
| 555227 | 3.4856E-8 | 555226 | 3.5058E-8 |
| 556248 | 3.4764E-8 | 556248 | 3.5085E-8 |
| 557270 | 3.4767E-8 | 557269 | 3.5028E-8 |
| 558291 | 3.4809E-8 | 558291 | 3.5015E-8 |
| 559313 | 3.473E-8  | 559312 | 3.4953E-8 |
| 560334 | 3.463E-8  | 560334 | 3.4894E-8 |
| 561356 | 3.4636E-8 | 561355 | 3.494E-8  |
| 562377 | 3.466E-8  | 562377 | 3.4913E-8 |
| 563399 | 3.4676E-8 | 563398 | 3.4934E-8 |
| 564420 | 3.4627E-8 | 564420 | 3.4848E-8 |
| 565442 | 3.4612E-8 | 565441 | 3.4868E-8 |
| 566463 | 3.4525E-8 | 566463 | 3.4757E-8 |
| 567485 | 3.4513E-8 | 567484 | 3.4799E-8 |
| 568506 | 3.4466E-8 | 568506 | 3.4779E-8 |
| 569528 | 3.4569E-8 | 569527 | 3.4719E-8 |
| 570549 | 3.4472E-8 | 570549 | 3.4718E-8 |
| 571571 | 3.4439E-8 | 571570 | 3.4657E-8 |
| 572592 | 3.4487E-8 | 572592 | 3.472E-8  |
| 573614 | 3.4451E-8 | 573613 | 3.4704E-8 |
| 574635 | 3.4414E-8 | 574635 | 3.4629E-8 |
| 575657 | 3.4391E-8 | 575656 | 3.4538E-8 |
| 576678 | 3.4404E-8 | 576678 | 3.456E-8  |
| 577700 | 3.4409E-8 | 577699 | 3.4507E-8 |
| 578721 | 3.4359E-8 | 578721 | 3.4573E-8 |
| 579743 | 3.4356E-8 | 579742 | 3.451E-8  |
| 580764 | 3.4322E-8 | 580764 | 3.452E-8  |
| 581786 | 3.4346E-8 | 581785 | 3.4504E-8 |
| 582807 | 3.4275E-8 | 582807 | 3.4511E-8 |
| 583829 | 3.4346E-8 | 583828 | 3.4409E-8 |
| 584850 | 3.4257E-8 | 584850 | 3.4367E-8 |
| 585872 | 3.4266E-8 | 585871 | 3.4396E-8 |
| 586893 | 3.4304E-8 | 586893 | 3.4407E-8 |
| 587915 | 3.4214E-8 | 587914 | 3.4332E-8 |
| 588936 | 3.4228E-8 | 588936 | 3.4345E-8 |
| 589958 | 3.4171E-8 | 589957 | 3.4323E-8 |
| 590979 | 3.4257E-8 | 590979 | 3.4243E-8 |

|        |           |        |           |
|--------|-----------|--------|-----------|
| 592001 | 3.4185E-8 | 592000 | 3.4235E-8 |
| 593022 | 3.4122E-8 | 593022 | 3.4291E-8 |
| 594044 | 3.4195E-8 | 594043 | 3.4287E-8 |
| 595065 | 3.4187E-8 | 595065 | 3.4224E-8 |
| 596087 | 3.4116E-8 | 596086 | 3.4257E-8 |
| 597108 | 3.4146E-8 | 597108 | 3.4257E-8 |
| 598130 | 3.4186E-8 | 598129 | 3.4163E-8 |
| 599151 | 3.4146E-8 | 599151 | 3.4241E-8 |
| 600173 | 3.413E-8  | 600172 | 3.4211E-8 |
| 601194 | 3.4123E-8 | 601194 | 3.414E-8  |
| 602216 | 3.4138E-8 | 602215 | 3.419E-8  |
| 603237 | 3.4064E-8 | 603237 | 3.4118E-8 |
| 604259 | 3.4058E-8 | 604258 | 3.4091E-8 |
| 605280 | 3.4099E-8 | 605280 | 3.4211E-8 |
| 606302 | 3.4043E-8 | 606301 | 3.4161E-8 |
| 607323 | 3.4072E-8 | 607323 | 3.4107E-8 |
| 608345 | 3.3969E-8 | 608344 | 3.4112E-8 |
| 609366 | 3.4042E-8 | 609366 | 3.4087E-8 |
| 610388 | 3.4103E-8 | 610387 | 3.4049E-8 |
| 611409 | 3.4052E-8 | 611409 | 3.4103E-8 |
| 612431 | 3.4018E-8 | 612430 | 3.407E-8  |
| 613452 | 3.4106E-8 | 613452 | 3.4017E-8 |
| 614474 | 3.398E-8  | 614473 | 3.4092E-8 |
| 615495 | 3.397E-8  | 615495 | 3.4031E-8 |
| 616517 | 3.3993E-8 | 616516 | 3.3985E-8 |
| 617538 | 3.3978E-8 | 617538 | 3.4076E-8 |
| 618560 | 3.3941E-8 | 618559 | 3.3993E-8 |
| 619581 | 3.397E-8  | 619581 | 3.3999E-8 |
| 620603 | 3.3942E-8 | 620602 | 3.3931E-8 |
| 621624 | 3.3946E-8 | 621624 | 3.3977E-8 |
| 622646 | 3.3976E-8 | 622645 | 3.3953E-8 |
| 623667 | 3.3884E-8 | 623667 | 3.3954E-8 |
| 624689 | 3.3878E-8 | 624688 | 3.382E-8  |
| 625710 | 3.3909E-8 | 625710 | 3.3938E-8 |
| 626732 | 3.3958E-8 | 626731 | 3.3941E-8 |
| 627753 | 3.3916E-8 | 627753 | 3.3953E-8 |
| 628775 | 3.3862E-8 | 628774 | 3.3968E-8 |
| 629796 | 3.3921E-8 | 629796 | 3.3888E-8 |
| 630817 | 3.3818E-8 | 630817 | 3.3873E-8 |
| 631839 | 3.3792E-8 | 631839 | 3.3923E-8 |
| 632860 | 3.3868E-8 | 632860 | 3.388E-8  |

|        |           |        |           |
|--------|-----------|--------|-----------|
| 633882 | 3.3889E-8 | 633882 | 3.388E-8  |
| 634903 | 3.3857E-8 | 634903 | 3.3928E-8 |
| 635925 | 3.3813E-8 | 635925 | 3.3931E-8 |
| 636946 | 3.3814E-8 | 636946 | 3.3781E-8 |
| 637968 | 3.3804E-8 | 637968 | 3.3898E-8 |
| 638989 | 3.3808E-8 | 638989 | 3.3841E-8 |
| 640011 | 3.3843E-8 | 640011 | 3.3874E-8 |
| 641032 | 3.3856E-8 | 641032 | 3.3892E-8 |
| 642054 | 3.3767E-8 | 642054 | 3.3832E-8 |
| 643075 | 3.3755E-8 | 643075 | 3.3834E-8 |
| 644097 | 3.3843E-8 | 644097 | 3.3844E-8 |
| 645118 | 3.3816E-8 | 645118 | 3.3757E-8 |
| 646140 | 3.3761E-8 | 646140 | 3.3809E-8 |
| 647161 | 3.3847E-8 | 647161 | 3.3769E-8 |
| 648183 | 3.3768E-8 | 648183 | 3.3793E-8 |
| 649204 | 3.3786E-8 | 649204 | 3.3754E-8 |
| 650226 | 3.3785E-8 | 650226 | 3.3836E-8 |
| 651247 | 3.381E-8  | 651247 | 3.3826E-8 |
| 652269 | 3.3795E-8 | 652269 | 3.3732E-8 |
| 653290 | 3.3805E-8 | 653290 | 3.3773E-8 |
| 654312 | 3.3774E-8 | 654312 | 3.3749E-8 |
| 655333 | 3.3743E-8 | 655333 | 3.3716E-8 |
| 656355 | 3.3717E-8 | 656355 | 3.378E-8  |
| 657376 | 3.3698E-8 | 657376 | 3.3735E-8 |
| 658398 | 3.3743E-8 | 658398 | 3.3734E-8 |
| 659419 | 3.3717E-8 | 659419 | 3.3798E-8 |
| 660441 | 3.372E-8  | 660441 | 3.3763E-8 |
| 661462 | 3.3742E-8 | 661462 | 3.3724E-8 |
| 662484 | 3.3716E-8 | 662484 | 3.3826E-8 |
| 663505 | 3.3685E-8 | 663505 | 3.3695E-8 |
| 664527 | 3.375E-8  | 664527 | 3.3688E-8 |
| 665548 | 3.372E-8  | 665548 | 3.3767E-8 |
| 666570 | 3.3679E-8 | 666570 | 3.371E-8  |
| 667591 | 3.3656E-8 | 667591 | 3.3699E-8 |
| 668613 | 3.3696E-8 | 668613 | 3.3828E-8 |
| 669634 | 3.3601E-8 | 669634 | 3.3761E-8 |
| 670656 | 3.3664E-8 | 670656 | 3.3691E-8 |
| 671677 | 3.3602E-8 | 671677 | 3.3777E-8 |
| 672699 | 3.3635E-8 | 672699 | 3.3724E-8 |
| 673720 | 3.367E-8  | 673720 | 3.3694E-8 |
| 674742 | 3.3644E-8 | 674742 | 3.3709E-8 |

|        |           |        |           |
|--------|-----------|--------|-----------|
| 675763 | 3.3532E-8 | 675763 | 3.3759E-8 |
| 676785 | 3.3635E-8 | 676785 | 3.3722E-8 |
| 677806 | 3.3636E-8 | 677806 | 3.3692E-8 |
| 678828 | 3.358E-8  | 678828 | 3.3653E-8 |
| 679849 | 3.3578E-8 | 679849 | 3.3609E-8 |
| 680871 | 3.3611E-8 | 680871 | 3.3667E-8 |
| 681892 | 3.3559E-8 | 681892 | 3.3712E-8 |
| 682914 | 3.3603E-8 | 682914 | 3.3666E-8 |
| 683935 | 3.3635E-8 | 683935 | 3.3656E-8 |
| 684957 | 3.3624E-8 | 684957 | 3.3635E-8 |
| 685978 | 3.3604E-8 | 685978 | 3.3611E-8 |
| 687000 | 3.3606E-8 | 687000 | 3.3593E-8 |
| 688021 | 3.3583E-8 | 688021 | 3.3642E-8 |
| 689043 | 3.364E-8  | 689043 | 3.3662E-8 |
| 690064 | 3.3596E-8 | 690064 | 3.3589E-8 |
| 691086 | 3.3601E-8 | 691086 | 3.3681E-8 |
| 692107 | 3.353E-8  | 692107 | 3.357E-8  |
| 693129 | 3.3542E-8 | 693129 | 3.3583E-8 |
| 694150 | 3.3532E-8 | 694150 | 3.3651E-8 |
| 695172 | 3.3522E-8 | 695172 | 3.3565E-8 |
| 696193 | 3.3529E-8 | 696193 | 3.3648E-8 |
| 697215 | 3.5027E-8 | 697215 | 3.3642E-8 |
| 698236 | 3.1945E-8 | 698236 | 3.356E-8  |
| 699258 | 3.3106E-8 | 699258 | 3.3534E-8 |
| 700279 | 4.0722E-8 | 700279 | 3.3646E-8 |
| 701301 | 4.0332E-8 | 701301 | 3.3538E-8 |
| 702322 | 4.7963E-8 | 702322 | 3.3574E-8 |
| 703344 | 5.7498E-8 | 703343 | 3.3595E-8 |
| 704365 | 6.0441E-8 | 704365 | 3.3548E-8 |
| 705387 | 6.1193E-8 | 705387 | 3.3497E-8 |
| 706408 | 6.1403E-8 | 706408 | 3.3575E-8 |
| 707430 | 6.1599E-8 | 707430 | 3.3546E-8 |
| 708451 | 6.1183E-8 | 708451 | 3.3885E-8 |
| 709473 | 5.2223E-8 | 709472 | 3.2906E-8 |
| 710494 | 4.1717E-8 | 710494 | 3.1284E-8 |
| 711516 | 3.7409E-8 | 711516 | 3.2576E-8 |
| 712537 | 3.6251E-8 | 712537 | 3.3913E-8 |
| 713559 | 3.5931E-8 | 713559 | 3.4481E-8 |
| 714580 | 3.56E-8   | 714580 | 3.4677E-8 |
| 715602 | 3.5655E-8 | 715602 | 3.4703E-8 |
| 716623 | 3.5423E-8 | 716623 | 3.4651E-8 |

|        |           |        |           |
|--------|-----------|--------|-----------|
| 717645 | 3.535E-8  | 717645 | 3.4635E-8 |
| 718666 | 3.538E-8  | 718667 | 3.4722E-8 |
| 719688 | 3.5302E-8 | 719688 | 3.4763E-8 |
| 720709 | 3.5303E-8 | 720710 | 3.4796E-8 |
| 721731 | 3.5169E-8 | 721731 | 3.4755E-8 |
| 722752 | 3.5232E-8 | 722753 | 3.5005E-8 |
| 723774 | 3.5181E-8 | 723774 | 3.5296E-8 |
| 724795 | 3.5125E-8 | 724796 | 3.5319E-8 |
| 725817 | 3.5071E-8 | 725817 | 3.5378E-8 |
| 726838 | 3.5101E-8 | 726839 | 3.5492E-8 |
| 727860 | 3.5021E-8 | 727860 | 3.5405E-8 |
| 728881 | 3.5047E-8 | 728882 | 3.5487E-8 |
| 729903 | 3.4989E-8 | 729903 | 3.5427E-8 |
| 730924 | 3.498E-8  | 730925 | 3.5413E-8 |
| 731945 | 3.5007E-8 | 731946 | 3.5298E-8 |
| 732967 | 3.4911E-8 | 732968 | 3.5415E-8 |
| 733989 | 3.4845E-8 | 733989 | 3.5497E-8 |
| 735010 | 3.4942E-8 | 735010 | 3.5324E-8 |
| 736032 | 3.4902E-8 | 736032 | 3.5314E-8 |
| 737053 | 3.4865E-8 | 737053 | 3.5395E-8 |
| 738075 | 3.4784E-8 | 738075 | 3.5257E-8 |
| 739096 | 3.4896E-8 | 739096 | 3.5288E-8 |
| 740117 | 3.485E-8  | 740118 | 3.5227E-8 |
| 741139 | 3.4728E-8 | 741139 | 3.5306E-8 |
| 742160 | 3.4655E-8 | 742161 | 3.5217E-8 |
| 743182 | 3.4767E-8 | 743182 | 3.519E-8  |
| 744203 | 3.464E-8  | 744204 | 3.5198E-8 |
| 745225 | 3.4573E-8 | 745225 | 3.5248E-8 |
| 746246 | 3.4712E-8 | 746247 | 3.5153E-8 |
| 747268 | 3.4611E-8 | 747269 | 3.5089E-8 |
| 748289 | 3.4582E-8 | 748290 | 3.5137E-8 |
| 749311 | 3.4616E-8 | 749312 | 3.5107E-8 |
| 750332 | 3.4562E-8 | 750333 | 3.5033E-8 |
| 751354 | 3.4493E-8 | 751355 | 3.5058E-8 |
| 752375 | 3.446E-8  | 752376 | 3.5047E-8 |
| 753397 | 3.4581E-8 | 753398 | 3.49E-8   |
| 754418 | 3.4432E-8 | 754419 | 3.5005E-8 |
| 755440 | 3.4462E-8 | 755441 | 3.4943E-8 |
| 756461 | 3.4488E-8 | 756462 | 3.492E-8  |
| 757483 | 3.4401E-8 | 757484 | 3.4927E-8 |
| 758504 | 3.4368E-8 | 758505 | 3.4886E-8 |

|        |           |        |           |
|--------|-----------|--------|-----------|
| 759526 | 3.4376E-8 | 759527 | 3.4861E-8 |
| 760547 | 3.4353E-8 | 760548 | 3.4872E-8 |
| 761569 | 3.4355E-8 | 761570 | 3.4836E-8 |
| 762591 | 3.4339E-8 | 762591 | 3.4789E-8 |
| 763612 | 3.429E-8  | 763612 | 3.4765E-8 |
| 764634 | 3.4216E-8 | 764634 | 3.4802E-8 |
| 765655 | 3.4304E-8 | 765655 | 3.4717E-8 |
| 766677 | 3.4252E-8 | 766677 | 3.4718E-8 |
| 767698 | 3.4336E-8 | 767698 | 3.4615E-8 |
| 768720 | 3.4183E-8 | 768720 | 3.4657E-8 |
| 769741 | 3.4221E-8 | 769741 | 3.4627E-8 |
| 770763 | 3.422E-8  | 770763 | 3.4569E-8 |
| 771784 | 3.4161E-8 | 771784 | 3.4621E-8 |
| 772806 | 3.4212E-8 | 772806 | 3.4564E-8 |
| 773827 | 3.4065E-8 | 773827 | 3.4591E-8 |
| 774849 | 3.4095E-8 | 774849 | 3.4558E-8 |
| 775870 | 3.4109E-8 | 775870 | 3.4549E-8 |
| 776892 | 3.4113E-8 | 776892 | 3.4483E-8 |
| 777913 | 3.4177E-8 | 777913 | 3.4428E-8 |
| 778934 | 3.4128E-8 | 778935 | 3.446E-8  |
| 779956 | 3.4098E-8 | 779957 | 3.4502E-8 |
| 780977 | 3.4113E-8 | 780978 | 3.4262E-8 |
| 781999 | 3.4066E-8 | 782000 | 3.4405E-8 |
| 783021 | 3.3994E-8 | 783021 | 3.4441E-8 |
| 784042 | 3.4021E-8 | 784043 | 3.4315E-8 |
| 785064 | 3.406E-8  | 785064 | 3.43E-8   |
| 786085 | 3.4E-8    | 786086 | 3.4343E-8 |
| 787107 | 3.3972E-8 | 787107 | 3.428E-8  |
| 788128 | 3.3944E-8 | 788128 | 3.428E-8  |
| 789150 | 3.395E-8  | 789150 | 3.4211E-8 |
| 790171 | 3.3949E-8 | 790171 | 3.4218E-8 |
| 791193 | 3.3904E-8 | 791193 | 3.4213E-8 |
| 792214 | 3.401E-8  | 792214 | 3.4183E-8 |
| 793236 | 3.3868E-8 | 793236 | 3.4277E-8 |
| 794257 | 3.3868E-8 | 794257 | 3.4159E-8 |
| 795279 | 3.3973E-8 | 795279 | 3.4198E-8 |
| 796300 | 3.3876E-8 | 796300 | 3.4161E-8 |
| 797322 | 3.3876E-8 | 797322 | 3.4121E-8 |
| 798343 | 3.3826E-8 | 798343 | 3.41E-8   |
| 799365 | 3.3946E-8 | 799365 | 3.4119E-8 |
| 800386 | 3.3883E-8 | 800386 | 3.4133E-8 |

|        |           |        |           |
|--------|-----------|--------|-----------|
| 801408 | 3.3877E-8 | 801408 | 3.4085E-8 |
| 802429 | 3.3887E-8 | 802430 | 3.4118E-8 |
| 803451 | 3.389E-8  | 803451 | 3.4125E-8 |
| 804472 | 3.3843E-8 | 804472 | 3.4033E-8 |
| 805494 | 3.3822E-8 | 805494 | 3.4134E-8 |
| 806515 | 3.385E-8  | 806516 | 3.4093E-8 |
| 807537 | 3.3849E-8 | 807537 | 3.4081E-8 |
| 808558 | 3.3795E-8 | 808559 | 3.4091E-8 |
| 809580 | 3.3886E-8 | 809580 | 3.4085E-8 |
| 810601 | 3.3804E-8 | 810602 | 3.405E-8  |
| 811623 | 3.3814E-8 | 811623 | 3.4058E-8 |
| 812644 | 3.3819E-8 | 812645 | 3.4079E-8 |
| 813666 | 3.378E-8  | 813666 | 3.4018E-8 |
| 814687 | 3.3725E-8 | 814688 | 3.3979E-8 |
| 815709 | 3.3745E-8 | 815709 | 3.4005E-8 |
| 816730 | 3.3816E-8 | 816731 | 3.3916E-8 |
| 817752 | 3.3718E-8 | 817752 | 3.3949E-8 |
| 818773 | 3.3709E-8 | 818774 | 3.3945E-8 |
| 819795 | 3.3785E-8 | 819795 | 3.3916E-8 |
| 820816 | 3.3743E-8 | 820817 | 3.3917E-8 |
| 821838 | 3.3683E-8 | 821838 | 3.3934E-8 |
| 822859 | 3.3647E-8 | 822860 | 3.3933E-8 |
| 823881 | 3.3696E-8 | 823881 | 3.3945E-8 |
| 824902 | 3.3687E-8 | 824903 | 3.3954E-8 |
| 825924 | 3.3683E-8 | 825924 | 3.3894E-8 |
| 826945 | 3.3814E-8 | 826946 | 3.3916E-8 |
| 827967 | 3.3716E-8 | 827967 | 3.3915E-8 |
| 828988 | 3.3636E-8 | 828989 | 3.3883E-8 |
| 830010 | 3.3675E-8 | 830010 | 3.3904E-8 |
| 831031 | 3.3606E-8 | 831032 | 3.3889E-8 |
| 832053 | 3.3632E-8 | 832053 | 3.3866E-8 |
| 833074 | 3.3687E-8 | 833075 | 3.3842E-8 |
| 834095 | 3.3691E-8 | 834096 | 3.3913E-8 |
| 835117 | 3.3675E-8 | 835118 | 3.3882E-8 |
| 836138 | 3.3644E-8 | 836139 | 3.3822E-8 |
| 837160 | 3.3662E-8 | 837161 | 3.3843E-8 |
| 838181 | 3.3646E-8 | 838182 | 3.379E-8  |
| 839203 | 3.3614E-8 | 839204 | 3.3802E-8 |
| 840224 | 3.3657E-8 | 840225 | 3.3827E-8 |
| 841246 | 3.366E-8  | 841247 | 3.3815E-8 |
| 842267 | 3.3544E-8 | 842268 | 3.3792E-8 |

|        |           |        |           |
|--------|-----------|--------|-----------|
| 843289 | 3.3635E-8 | 843290 | 3.3823E-8 |
| 844310 | 3.3614E-8 | 844311 | 3.38E-8   |
| 845332 | 3.3642E-8 | 845333 | 3.3765E-8 |
| 846353 | 3.3605E-8 | 846354 | 3.3839E-8 |
| 847375 | 3.3666E-8 | 847376 | 3.3779E-8 |
| 848396 | 3.3613E-8 | 848397 | 3.3789E-8 |
| 849418 | 3.3608E-8 | 849419 | 3.3749E-8 |
| 850439 | 3.3601E-8 | 850440 | 3.3787E-8 |
| 851461 | 3.3579E-8 | 851462 | 3.3729E-8 |
| 852482 | 3.3594E-8 | 852483 | 3.3761E-8 |
| 853504 | 3.3572E-8 | 853505 | 3.382E-8  |
| 854525 | 3.3482E-8 | 854526 | 3.3734E-8 |
| 855547 | 3.3592E-8 | 855548 | 3.3732E-8 |
| 856568 | 3.3593E-8 | 856569 | 3.3822E-8 |
| 857590 | 3.3605E-8 | 857591 | 3.3769E-8 |
| 858611 | 3.3494E-8 | 858612 | 3.3691E-8 |
| 859633 | 3.3609E-8 | 859634 | 3.3761E-8 |
| 860654 | 3.353E-8  | 860655 | 3.3724E-8 |
| 861676 | 3.3513E-8 | 861677 | 3.372E-8  |
| 862697 | 3.3611E-8 | 862698 | 3.3777E-8 |
| 863719 | 3.356E-8  | 863720 | 3.3676E-8 |
| 864740 | 3.3533E-8 | 864741 | 3.3681E-8 |
| 865762 | 3.3552E-8 | 865763 | 3.3753E-8 |
| 866783 | 3.3565E-8 | 866784 | 3.3724E-8 |
| 867805 | 3.3503E-8 | 867806 | 3.3679E-8 |
| 868826 | 3.3495E-8 | 868827 | 3.3754E-8 |
| 869848 | 3.3535E-8 | 869849 | 3.3759E-8 |
| 870869 | 3.3516E-8 | 870870 | 3.3703E-8 |
| 871891 | 3.356E-8  | 871892 | 3.3693E-8 |
| 872912 | 3.3466E-8 | 872913 | 3.3679E-8 |
| 873934 | 3.348E-8  | 873935 | 3.37E-8   |
| 874955 | 3.3486E-8 | 874956 | 3.3685E-8 |
| 875977 | 3.3447E-8 | 875978 | 3.3687E-8 |
| 876998 | 3.3458E-8 | 876999 | 3.3612E-8 |
| 878020 | 3.3433E-8 | 878021 | 3.3661E-8 |
| 879041 | 3.3449E-8 | 879042 | 3.3716E-8 |
| 880063 | 3.3444E-8 | 880064 | 3.3672E-8 |
| 881084 | 3.3495E-8 | 881085 | 3.3618E-8 |
| 882106 | 3.3463E-8 | 882107 | 3.3677E-8 |
| 883127 | 3.3462E-8 | 883128 | 3.3582E-8 |
| 884149 | 3.3541E-8 | 884150 | 3.3629E-8 |

|        |           |        |           |
|--------|-----------|--------|-----------|
| 885170 | 3.3467E-8 | 885171 | 3.3633E-8 |
| 886192 | 3.3423E-8 | 886193 | 3.3658E-8 |
| 887213 | 3.3454E-8 | 887214 | 3.361E-8  |
| 888235 | 3.3486E-8 | 888236 | 3.3663E-8 |
| 889256 | 3.3431E-8 | 889257 | 3.3619E-8 |
| 890278 | 3.3397E-8 | 890279 | 3.3655E-8 |
| 891299 | 3.3459E-8 | 891300 | 3.3693E-8 |
| 892321 | 3.3421E-8 | 892322 | 3.3667E-8 |
| 893342 | 3.4894E-8 | 893343 | 3.3615E-8 |
| 894364 | 3.1686E-8 | 894365 | 3.3579E-8 |
| 895385 | 3.3027E-8 | 895386 | 3.3642E-8 |
| 896407 | 4.0311E-8 | 896408 | 3.3516E-8 |
| 897428 | 4.0253E-8 | 897429 | 3.3592E-8 |
| 898450 | 4.839E-8  | 898451 | 3.354E-8  |
| 899471 | 5.751E-8  | 899472 | 3.3525E-8 |
| 900493 | 6.0274E-8 | 900494 | 3.3591E-8 |
| 901514 | 6.0993E-8 | 901515 | 3.355E-8  |
| 902536 | 6.1111E-8 | 902537 | 3.3587E-8 |
| 903557 | 6.1315E-8 | 903558 | 3.3566E-8 |
| 904579 | 6.0711E-8 | 904580 | 3.4098E-8 |
| 905600 | 5.135E-8  | 905601 | 3.2744E-8 |
| 906622 | 4.1106E-8 | 906623 | 3.1376E-8 |
| 907643 | 3.7089E-8 | 907644 | 3.2708E-8 |
| 908665 | 3.6074E-8 | 908666 | 3.3817E-8 |
| 909686 | 3.5673E-8 | 909687 | 3.4572E-8 |
| 910708 | 3.5471E-8 | 910709 | 3.4674E-8 |
| 911729 | 3.5399E-8 | 911730 | 3.4638E-8 |
| 912751 | 3.5314E-8 | 912752 | 3.4658E-8 |
| 913772 | 3.5255E-8 | 913773 | 3.4662E-8 |
| 914794 | 3.5136E-8 | 914795 | 3.4704E-8 |
| 915815 | 3.5254E-8 | 915816 | 3.4726E-8 |
| 916837 | 3.5138E-8 | 916838 | 3.4748E-8 |
| 917858 | 3.5091E-8 | 917859 | 3.4788E-8 |
| 918880 | 3.5158E-8 | 918881 | 3.5067E-8 |
| 919901 | 3.5088E-8 | 919902 | 3.5314E-8 |
| 920923 | 3.5005E-8 | 920924 | 3.5308E-8 |
| 921944 | 3.507E-8  | 921945 | 3.5372E-8 |
| 922966 | 3.4982E-8 | 922967 | 3.5349E-8 |
| 923987 | 3.4885E-8 | 923988 | 3.5425E-8 |
| 925009 | 3.4874E-8 | 925010 | 3.5346E-8 |
| 926030 | 3.4893E-8 | 926031 | 3.5379E-8 |

|        |           |        |           |
|--------|-----------|--------|-----------|
| 927052 | 3.4865E-8 | 927053 | 3.5503E-8 |
| 928073 | 3.4861E-8 | 928074 | 3.5342E-8 |
| 929095 | 3.4863E-8 | 929096 | 3.5363E-8 |
| 930116 | 3.4839E-8 | 930117 | 3.5387E-8 |
| 931138 | 3.4737E-8 | 931139 | 3.5354E-8 |
| 932159 | 3.4738E-8 | 932160 | 3.5365E-8 |
| 933181 | 3.4739E-8 | 933182 | 3.5311E-8 |
| 934202 | 3.4656E-8 | 934203 | 3.53E-8   |
| 935224 | 3.4641E-8 | 935225 | 3.5237E-8 |
| 936245 | 3.4692E-8 | 936246 | 3.52E-8   |
| 937267 | 3.4612E-8 | 937268 | 3.5214E-8 |
| 938288 | 3.4595E-8 | 938289 | 3.5216E-8 |
| 939310 | 3.4501E-8 | 939311 | 3.5178E-8 |
| 940331 | 3.4579E-8 | 940332 | 3.5181E-8 |
| 941353 | 3.4615E-8 | 941354 | 3.51E-8   |
| 942374 | 3.4472E-8 | 942375 | 3.504E-8  |
| 943396 | 3.4502E-8 | 943397 | 3.5157E-8 |
| 944417 | 3.4523E-8 | 944418 | 3.5054E-8 |
| 945439 | 3.4357E-8 | 945440 | 3.5029E-8 |
| 946460 | 3.4428E-8 | 946461 | 3.5099E-8 |
| 947482 | 3.4417E-8 | 947483 | 3.5031E-8 |
| 948503 | 3.4333E-8 | 948504 | 3.4948E-8 |
| 949525 | 3.4326E-8 | 949526 | 3.5002E-8 |
| 950546 | 3.4339E-8 | 950547 | 3.4931E-8 |
| 951568 | 3.4298E-8 | 951569 | 3.4897E-8 |
| 952589 | 3.4261E-8 | 952590 | 3.4891E-8 |
| 953611 | 3.4317E-8 | 953612 | 3.4933E-8 |
| 954632 | 3.4303E-8 | 954633 | 3.4873E-8 |
| 955654 | 3.4269E-8 | 955655 | 3.4884E-8 |
| 956675 | 3.4204E-8 | 956676 | 3.478E-8  |
| 957697 | 3.4271E-8 | 957698 | 3.4782E-8 |
| 958718 | 3.4213E-8 | 958719 | 3.4798E-8 |
| 959740 | 3.4229E-8 | 959741 | 3.4751E-8 |
| 960761 | 3.4186E-8 | 960762 | 3.4651E-8 |
| 961783 | 3.4187E-8 | 961784 | 3.4732E-8 |
| 962804 | 3.407E-8  | 962805 | 3.4697E-8 |
| 963826 | 3.4101E-8 | 963827 | 3.4637E-8 |
| 964847 | 3.4073E-8 | 964848 | 3.4713E-8 |
| 965869 | 3.4062E-8 | 965870 | 3.4608E-8 |
| 966890 | 3.4062E-8 | 966891 | 3.4531E-8 |
| 967912 | 3.4155E-8 | 967913 | 3.4561E-8 |

|         |           |         |           |
|---------|-----------|---------|-----------|
| 968933  | 3.403E-8  | 968934  | 3.4577E-8 |
| 969955  | 3.4082E-8 | 969956  | 3.4499E-8 |
| 970976  | 3.4041E-8 | 970977  | 3.4512E-8 |
| 971998  | 3.3983E-8 | 971999  | 3.4494E-8 |
| 973019  | 3.397E-8  | 973020  | 3.4447E-8 |
| 974041  | 3.4009E-8 | 974042  | 3.4409E-8 |
| 975062  | 3.3935E-8 | 975063  | 3.4413E-8 |
| 976084  | 3.4059E-8 | 976085  | 3.4372E-8 |
| 977105  | 3.3941E-8 | 977106  | 3.4405E-8 |
| 978127  | 3.3933E-8 | 978128  | 3.432E-8  |
| 979148  | 3.3904E-8 | 979149  | 3.4449E-8 |
| 980170  | 3.3923E-8 | 980171  | 3.4378E-8 |
| 981191  | 3.3892E-8 | 981192  | 3.4247E-8 |
| 982213  | 3.3881E-8 | 982214  | 3.4343E-8 |
| 983234  | 3.3967E-8 | 983235  | 3.4343E-8 |
| 984256  | 3.3914E-8 | 984257  | 3.4208E-8 |
| 985277  | 3.3839E-8 | 985278  | 3.4309E-8 |
| 986299  | 3.3963E-8 | 986300  | 3.4226E-8 |
| 987320  | 3.3823E-8 | 987321  | 3.421E-8  |
| 988342  | 3.3783E-8 | 988343  | 3.4183E-8 |
| 989363  | 3.3882E-8 | 989364  | 3.4238E-8 |
| 990385  | 3.3825E-8 | 990386  | 3.4139E-8 |
| 991406  | 3.3796E-8 | 991407  | 3.4115E-8 |
| 992428  | 3.3777E-8 | 992429  | 3.4156E-8 |
| 993449  | 3.3847E-8 | 993450  | 3.4124E-8 |
| 994471  | 3.3775E-8 | 994472  | 3.407E-8  |
| 995492  | 3.3724E-8 | 995493  | 3.4152E-8 |
| 996514  | 3.3007E-8 | 996515  | 3.4182E-8 |
| 997535  | 3.1888E-8 | 997536  | 3.4125E-8 |
| 998557  | 3.0748E-8 | 998558  | 3.4081E-8 |
| 999578  | 2.9803E-8 | 999579  | 3.4105E-8 |
| 1000600 | 2.8871E-8 | 1000600 | 3.4033E-8 |
| 1001621 | 2.8045E-8 | 1001622 | 3.4011E-8 |
| 1002643 | 2.7356E-8 | 1002643 | 3.4034E-8 |
| 1003664 | 2.6777E-8 | 1003665 | 3.4069E-8 |
| 1004686 | 2.6236E-8 | 1004687 | 3.4008E-8 |
| 1005707 | 2.5774E-8 | 1005708 | 3.3969E-8 |
| 1006729 | 2.5472E-8 | 1006729 | 3.3982E-8 |
| 1007750 | 2.5192E-8 | 1007751 | 3.3439E-8 |
| 1008772 | 2.4917E-8 | 1008772 | 3.2367E-8 |
|         |           | 1009794 | 3.1322E-8 |

|  |  |         |           |
|--|--|---------|-----------|
|  |  | 1010816 | 3.0412E-8 |
|  |  | 1011837 | 2.945E-8  |
|  |  | 1012859 | 2.8594E-8 |
|  |  | 1013880 | 2.7857E-8 |

**Table S6:** raw data for Fig. 7 for TDMAT-NH<sub>3</sub> showing survey scans during deposition, MID scans for m/z = 44 and m/z = 45 created during both the plasma and thermal processes

| Survey scans |                  |     |                  | MID scans |                         |                         |        |                         |                         |
|--------------|------------------|-----|------------------|-----------|-------------------------|-------------------------|--------|-------------------------|-------------------------|
| PLASMA       | THERMAL          |     |                  | PLASMA    | THERMAL                 |                         |        |                         |                         |
| m/z          | Partial pressure | m/z | Partial pressure | Time      | Partial pressure (mbar) | Partial pressure (mbar) | Time   | Partial pressure (mbar) | Partial pressure (mbar) |
|              | mbar             |     | mbar             | (ms)      | m/z = 44                | m/z = 45                | (ms)   | m/z = 44                | m/z = 45                |
| 1            | 4.34E-11         | 1   | 6.17E-11         | 7664      | 5.78E-10                | 1.97E-11                | 7664   | 4.88E-10                | 1.73E-11                |
| 2            | 7.42E-9          | 2   | 2.54E-9          | 33670     | 4.7E-10                 | 1.7E-11                 | 33670  | 4.74E-10                | 1.77E-11                |
| 3            | 1.32E-11         | 3   | 6.56E-12         | 59676     | 4.86E-10                | 2.88E-11                | 59676  | 4.7E-10                 | 2.18E-11                |
| 4            | 1.01E-10         | 4   | 1.08E-10         | 85682     | 4.57E-10                | 2.52E-11                | 85682  | 4.7E-10                 | 1.41E-11                |
| 5            | 2.26E-12         | 5   | -4.9E-12         | 111688    | 6.39E-10                | 9.38E-11                | 111689 | 5.94E-10                | 8.26E-11                |
| 6            | -4.4E-12         | 6   | -3.01E-12        | 137695    | 4.8E-10                 | 3.23E-11                | 137695 | 4.8E-10                 | 3.82E-11                |
| 7            | 4.89E-11         | 7   | 3.06E-11         | 163701    | 4.79E-10                | 2.19E-12                | 163701 | 4.74E-10                | 3.54E-11                |
| 8            | 3.21E-12         | 8   | -2.95E-12        | 189707    | 4.7E-10                 | 4.17E-11                | 189707 | 4.79E-10                | 3.48E-11                |
| 9            | 2.32E-12         | 9   | -1.63E-12        | 215714    | 4.8E-10                 | 3.35E-11                | 215714 | 4.91E-10                | 1.69E-11                |
| 10           | 6.64E-12         | 10  | -6.51E-12        | 241720    | 4.69E-10                | 2.1E-11                 | 241720 | 4.86E-10                | 8.2E-12                 |
| 11           | 2.98E-12         | 11  | -3.79E-12        | 267726    | 4.65E-10                | 8.77E-12                | 267726 | 4.96E-10                | 1.21E-11                |
| 12           | 1.83E-11         | 12  | 2.12E-11         | 293732    | 4.74E-10                | 1.05E-10                | 293732 | 4.96E-10                | 1.42E-10                |
| 13           | 7.24E-11         | 13  | 8.38E-11         | 319739    | 5.34E-10                | 3.97E-11                | 319738 | 5.26E-10                | 6.53E-11                |
| 14           | 1.08E-8          | 14  | 1.08E-8          | 345745    | 4.78E-10                | 3.07E-11                | 345745 | 5.02E-10                | 3.14E-11                |
| 15           | 5.95E-10         | 15  | 6.58E-10         | 371751    | 4.78E-10                | 2.2E-11                 | 371751 | 4.88E-10                | 2.4E-11                 |
| 16           | 3.45E-9          | 16  | 4.93E-9          | 397757    | 4.71E-10                | 2.12E-11                | 397757 | 4.81E-10                | 3.84E-11                |
| 17           | 4.95E-9          | 17  | 6.74E-9          | 423764    | 4.85E-10                | 3.06E-11                | 423763 | 5.03E-10                | 1.43E-11                |
| 18           | 3.23E-9          | 18  | 3.05E-9          | 449770    | 5.14E-10                | 2.35E-11                | 449769 | 5.06E-10                | 1.28E-11                |
| 19           | 7.79E-11         | 19  | 7.61E-11         | 475776    | 4.91E-10                | 8.15E-12                | 475776 | 4.86E-10                | 3.31E-11                |
| 20           | 1.08E-8          | 20  | 1.08E-8          | 501782    | 7.6E-10                 | 9.32E-11                | 501782 | 6.27E-10                | 9.66E-11                |
| 21           | 7.97E-12         | 21  | 1.92E-12         | 527789    | 5.03E-10                | 2.7E-11                 | 527788 | 5.15E-10                | 4.31E-11                |
| 22           | 8.32E-12         | 22  | 1.3E-11          | 553795    | 4.99E-10                | 1.66E-11                | 553795 | 5.1E-10                 | 1.81E-11                |
| 23           | 4.06E-12         | 23  | -5.93E-12        | 579801    | 4.92E-10                | 2.22E-11                | 579801 | 4.76E-10                | 3.57E-11                |
| 24           | -1.84E-12        | 24  | 1.64E-11         | 605807    | 4.96E-10                | 3.62E-11                | 605807 | 5.13E-10                | 3.08E-11                |
| 25           | 5.74E-12         | 25  | 4.49E-12         | 631814    | 4.83E-10                | 2.02E-11                | 631813 | 5.09E-10                | 3.06E-11                |
| 26           | 4.63E-11         | 26  | 3.88E-11         | 657820    | 4.89E-10                | 2.27E-11                | 657819 | 5.12E-10                | 2.02E-11                |
| 27           | 1.07E-9          | 27  | 1.08E-9          | 683826    | 4.95E-10                | 1.99E-11                | 683826 | 5.07E-10                | 4.79E-11                |
| 28           | 1.08E-8          | 28  | 1.08E-8          | 709832    | 6.14E-10                | 5.23E-11                | 709832 | 5.81E-10                | 4.97E-11                |
| 29           | 1.08E-8          | 29  | 1.08E-8          | 735839    | 5.06E-10                | 2.55E-11                | 735838 | 5.05E-10                | 3.96E-11                |
| 30           | 5.14E-10         | 30  | 5.52E-10         | 761845    | 4.84E-10                | 4.58E-11                | 761845 | 4.95E-10                | 3.19E-11                |
| 31           | 5.71E-11         | 31  | 3.42E-11         | 787851    | 4.98E-10                | 3.16E-11                | 787851 | 5.06E-10                | 2.82E-11                |
| 32           | 3.86E-10         | 32  | 3.76E-10         | 813857    | 5.08E-10                | 3.13E-11                | 813857 | 5.00E-10                | 3.28E-11                |
| 33           | 1.26E-11         | 33  | 1.95E-11         | 839864    | 5.06E-10                | 2.51E-11                | 839863 | 5.35E-10                | 1.61E-11                |
| 34           | 1.32E-11         | 34  | 8.06E-12         | 865870    | 5.19E-10                | 2.48E-11                | 865870 | 5.24E-10                | 2.65E-11                |
| 35           | 1.25E-11         | 35  | 6.89E-12         | 891876    | 5.03E-10                | 1.73E-10                | 891876 | 7.12E-10                | 1.11E-10                |
| 36           | 1.25E-11         | 36  | 6.89E-12         | 917882    | 5.25E-10                | 4.58E-11                | 917882 | 5.33E-10                | 5.59E-11                |
| 37           | 1.95E-11         | 37  | 9.01E-12         | 943889    | 5.01E-10                | 3.22E-11                | 943888 | 5.08E-10                | 4.00E-11                |
| 38           | 4.03E-10         | 38  | 3.97E-10         | 969895    | 4.9E-10                 | 3.22E-11                | 969895 | 4.99E-10                | 3.42E-11                |
| 39           | 1.87E-10         | 39  | 1.86E-10         |           |                         |                         |        |                         |                         |
| 40           | 1.08E-8          | 40  | 1.08E-8          |           |                         |                         |        |                         |                         |
| 41           | 9.24E-11         | 41  | 8.74E-11         |           |                         |                         |        |                         |                         |
| 42           | 1.77E-10         | 42  | 1.76E-10         |           |                         |                         |        |                         |                         |
| 43           | 5.34E-11         | 43  | 3.8E-11          |           |                         |                         |        |                         |                         |
| 44           | 5.08E-10         | 44  | 4.86E-10         |           |                         |                         |        |                         |                         |
| 45           | 3.83E-11         | 45  | 3.03E-11         |           |                         |                         |        |                         |                         |
| 46           | 2.24E-12         | 46  | 6.26E-14         |           |                         |                         |        |                         |                         |
| 47           | 1.13E-11         | 47  | 3.33E-12         |           |                         |                         |        |                         |                         |
| 48           | 1.21E-11         | 48  | 2.62E-12         |           |                         |                         |        |                         |                         |
| 49           | 3.8E-12          | 49  | 1.38E-11         |           |                         |                         |        |                         |                         |
| 50           | 2.44E-12         | 50  | 2.05E-12         |           |                         |                         |        |                         |                         |

**Table S7:** raw data for Fig.9 for the Arrhenius plots for the NH<sub>3</sub> pulse during both the plasma and thermal processes

| 1000/T (1/K)     | ln k     | Temperature | 1000/T (1/K)      | ln k     |
|------------------|----------|-------------|-------------------|----------|
| NH3 plasma pulse | Plasma   | ° C         | NH3 thermal pulse | Thermal  |
| 0.00236          | -6.64539 | 150         | 0.00236           | -6.81245 |
| 0.00211          | -5.71383 | 200         | 0.00211           | -6.21461 |
| 0.00191          | -5.3817  | 250         | 0.00191           | -5.03595 |
| 0.00174          | -4.50081 | 300         | 0.00174           | -4.7217  |
